# Supplementary material for: Mismatches between the genetic and phenotypic sex in the wild Kou population of Nile tilapia Oreochromis niloticus
Source: PeerJ. 2019 Sep 18;7:e7709. doi: 10.7717/peerj.7709 (PMC6754722; doi:10.7717/peerj.7709)
Supplement: Table S1 — The SNP is named according to the sequence TTATATTTATG considered. [file peerj-07-7709-s003.xlsx]

## Sheet: Table S1
SNP Name	Previous ID	Feature	Consequence	Sanger sequence	SNP type	Amino acids	Association
amh_7010	amh_202	Exon 1	upstream	CAGAAAGGGGACCCC[A/G]GGTGGTG	A/G		Sex
amh_7072	amh_264	Exon 1	upstream	AGATCTGACCACACA[G/A]ACGCACG	A/G		Pop
amh_7088	amh_280	Exon 1	upstream	GACGCACGCGCAGACA[C/T]TGCAAAC	C/T		Sex
amh_7403	amh_597	Exon 2	non-synonmous	CATCTTTGCAGCGTTGCGTGA[T/G]GGTGT	T/G	RDG/REG	Sex
amh_7419	amh_611	Exon 2	non-synonmous	GGTGTGGGGGACA[G/A]CGGCGA	G/A	DSQ/DNQ	Sex
amh_7488	amh_680	Exon 2		CGCTCATCAGCCT[C/C]GGTCTCGTTAG	C	ASV	not polymorphic (C/T) (Li et al., 2015)
amh_7562	amh_754	Intron 2		AGCTGAAAC[C/T]GCATTCCTGCTATT	C/T		Sex
amh_7683	amh_875	Exon 3	synonmous	CCCACGGCCTCC[A/T]TCGCTCATG	A/T	PPS/PPS	Sex
amh_7724	amh_916	Exon 3	non-synonmous	TTGGTCTTTGAAA[A/G]TCCACTGGCA	A/G	ENP/ESP	Sex
amh_8809	amh_1996	Exon 6	synonmous	GTCTTTGGCTTCACGAG[C/T]TGGGGC	C/T	TSW/TSW	Pop
amh_8818	amh_2005	Exon 6	synonmous	TTCACGAGCTGGGGCTC[C/T]GTGTTGCCGG	C/T	GSV/GSV	Pop
amh_8940	amh_2127	Exon 6	non-synonmous	AAGAGGTTTCAC[T/C]GGGAGCCAAGGAG	C/T	SLG/SPG	Pop
amh_8941	amh_2128	Exon 6	synonmous	AAGAGGTTTCACT[A/G]GGAGCCAAGGAG	A/G	SPG/SPG	Pop
amh_8990	amh_2183	Exon 6				KEH	not polymorphic (C/G) (Wessels et al., 2014)
amh_9299	amh_2486	Intron 6		TCAGATTATTTTAAGTCTTGTG[C/T]ACAAA	C/T		Sex
amh_9476	amh_2664	Intron 6		TGTGAGCTTGGCTGA[C/T]GTTCAAAAAGGC	C/T		Sex
amh_9480	amh_2668	Intron 6		TGTGAGCTTGGCTGACGTTC[A/C]AAAAGGC	A/C		Sex
amh_9805	amh_2992	Exon 7	non-synonmous	GGGAGTCAGTTCCGTG[C/T]GTTTCTT	C/T	RAF/RVF	Sex	(Eshel et al., 2014)
amh_9993	amh_3180	Exon 7	non-synonmous	AAGGCTCTCACCGTGT[C/T]CCTGA	C/T	GPC/GSC	Sex
