# Supplementary material for: Mismatches between the genetic and phenotypic sex in the wild Kou population of Nile tilapia Oreochromis niloticus
Source: PeerJ. 2019 Sep 18;7:e7709. doi: 10.7717/peerj.7709 (PMC6754722; doi:10.7717/peerj.7709)
Supplement: Table S2 — Data are represented as Mean value ±Standard deviation. [file peerj-07-7709-s004.xlsx]

## Sheet: Table S2 
	Temperatures	pH	Dissolved oxygen
	(°C)		(mg/L)
Lake Kou*	30.99 ± 2.1	5.55 ± 0.2	5.43 ± 2.2
Well water	28.35 ± 0.9	5.87 ± 0.6	5.36 ± 0.8
Breeding	29.21 ± 0.5	6.38 ± 0.5	6.72 ± 0.6
Egg incubation	27.41 ± 0.6	6.37 ± 0.5	6.98 ± 0.5
Sexual differentiation	27.91 ± 0.8	7.27 ± 0.5	6.71 ± 0.3
Growing phase until sexing	29.61 ± 0.8	7.19 ± 0.3	4.99 ± 1.0
*Recordings 4 times/day in 3 different areas at 5 & 20 cm depth
Other recorded parameters were done 2 to 3 times/day
