# Supplementary material for: Mismatches between the genetic and phenotypic sex in the wild Kou population of Nile tilapia Oreochromis niloticus
Source: PeerJ. 2019 Sep 18;7:e7709. doi: 10.7717/peerj.7709 (PMC6754722; doi:10.7717/peerj.7709)
Supplement: Table S3 — Raw data. Figure of pH values recorder showing two extreme values that were not in the common range and therefore we have eliminated them. [file peerj-07-7709-s005.xlsx]

## Sheet: Table S3 
Days	Hours	Sites	Depth	Temperatures (°C)	pH	Dissolved oxygen (mg/L)
Day1	06:00:00	1	5cm	29.2	5.67	0.66
		1	20cm	29.4	6.08	0.1
		2	5cm	28.5	5.68	0.33
		2	20cm	29.2	5.57	0.53
		3	5cm	29.4	6.12	0.08
		3	20cm	28.4	5.53	0.26
	10:00:00	1	5cm	32.2	5.79	4.95
		1	20cm	31.8	6.03	2.17
		2	5cm	30.2	5.49	0.94
		2	20cm	30.6	5.62	0.87
		3	5cm	30.4	5.93	0.16
		3	20cm	29.6	5.43	0.4
	14:00:00	1	5cm	35.1	5.99	11.06
		1	20cm	33.9	6.02	4.74
		2	5cm	30.8	5.54	1.11
		2	20cm	31.5	5.67	1.51
		3	5cm	31	6.03	0.17
		3	20cm	29.8	5.62	0.31
	18:00:00	1	5cm	33.2	6.13	9.7
		1	20cm	32.4	6.03	2.5
		2	5cm	30.2	5.54	0.9
		2	20cm	31.1	5.8	1.56
		3	5cm	31	6.03	0.26
		3	20cm	29.6	5.5	0.14
Day2	06:00:00	1	5cm	28.7	5.49	2.6
		1	20cm	28.1	5.43	2.83
		2	5cm	28	5.46	3.08
		2	20cm	28.7	5.43	2.51
		3	5cm	28.4	5.35	2.73
		3	20cm	28.2	5.5	2.83
	10:00:00	1	5cm	33.2	5.71	7.37
		1	20cm	32.8	5.54	7.13
		2	5cm	32.7	5.49	8.28
		2	20cm	33.2	5.63	7.06
		3	5cm	33	5.72	7.36
		3	20cm	33	5.6	16.32
	14:00:00	1	5cm	34.4	5.76	6.83
		1	20cm	34.4	5.7	7.64
		2	5cm	34.3	5.66	7.89
		2	20cm	34.5	5.59	0.12
		3	5cm	34.2	5.74	8.13
		3	20cm	34.3	6.08	0.11
	18:00:00	1	5cm	32.7	5.36	5.87
		1	20cm	32.5	5.19	6.29
		2	5cm	32.7	5.1	6.32
		2	20cm	32.4	5.13	0.18
		3	5cm	32.9	5.2	6.31
		3	20cm	32.9	5.14	3.36
Day3	06:00:00	1	5cm	26.9	5.6	3.78
		1	20cm	27.3	5.4	0.14
		2	5cm	27.3	5.34	3.66
		2	20cm	27.6	5.54	0.08
		3	5cm	27.6	5.37	3.49
		3	20cm	27.7	5.33	0.1
	10:00:00	1	5cm	31.6	5.7	8.78
		1	20cm	31.6	5.56	7.41
		2	5cm	31	5.36	7.51
		2	20cm	31.1	5.38	7.39
		3	5cm	30.8	5.23	5.9
		3	20cm	31.1	5.34	6.83
	14:00:00	1	5cm	33.7	5.93	8.43
		1	20cm	33.5	5.72	7.96
		2	5cm	33.2	5.55	7.84
		2	20cm	33.3	5.58	7.77
		3	5cm	32.7	5.37	5.94
		3	20cm	32.8	5.47	6.4
	18:00:00	1	5cm	32.4	6.03	7.3
		1	20cm	32.4	5.86	6.88
		2	5cm	31.7	5.49	7.32
		2	20cm	31.7	5.45	7.24
		3	5cm	31.6	5.39	6.95
		3	20cm	31.7	5.44	7.27
Day4	06:00:00	1	5cm	28.1	5.33	2.04
		1	20cm	28.2	5.25	1.82
		2	5cm	28.2	5.21	2.54
		2	20cm	28.2	5.26	2.33
		3	5cm	28	5.31	3.79
		3	20cm	28.2	5.33	3.21
	10:00:00	1	5cm	30.5	5.14	3.97
		1	20cm	30.5	5.05	3.52
		2	5cm	30.9	5.23	6.72
		2	20cm	30.8	5.46	7.79
		3	5cm	30.7	5.34	5.96
		3	20cm	30.8	5.32	6
	14:00:00	1	5cm	35	5.33	8.78
		1	20cm	34.9	5.24	7.51
		2	5cm	34.7	5.07	9.11
		2	20cm	34.3	5.04	10.05
		3	5cm	34	5.34	6.72
		3	20cm	34	5.18	6.98
	18:00:00	1	5cm	33.1	5.51	5.58
		1	20cm	32.5	5.18	5.03
		2	5cm	33	5.16	6.25
		2	20cm	33.1	5.15	6.42
		3	5cm	33	5.19	7.51
		3	20cm	33.1	5.11	7.1
Day5	06:00:00	1	5cm	28.8	5.46	3.56
		1	20cm	28.8	5.37	3.54
		2	5cm	28.8	5.25	3.68
		2	20cm	28.8	5.22	3.83
		3	5cm	28.7	5.2	3.02
		3	20cm	28.8	5.3	3
	10:00:00	1	5cm	32.4	5.34	5.56
		1	20cm	32.4	5.29	5.27
		2	5cm	32.1	5.25	3.75
		2	20cm	32.2	5.22	6.09
		3	5cm	32.7	5.31	6.22
		3	20cm	32.5	5.19	5.16
	14:00:00	1	5cm	34.1	5.5	5.98
		1	20cm	33.9	5.34	5.9
		2	5cm	33.3	5.16	3.9
		2	20cm	33.9	5.28	5.45
		3	5cm	34.1	5.28	6.47
		3	20cm	34.2	5.26	6.16
	18:00:00	1	5cm	32.8	5.55	6.09
		1	20cm	32.7	5.35	5.93
		2	5cm	32.6	5.17	5.59
		2	20cm	32.9	5.26	6.07
		3	5cm	32.7	5.18	5.99
		3	20cm	32.5	5.08	5.63
Day6	06:00:00	1	5cm	27.5	5.68	3.36
		1	20cm	28.1	5.7	0.12
		2	5cm	27.8	5.4	4.03
		2	20cm	27.9	5.4	4
		3	5cm	27.6	5.43	3.82
		3	20cm	27.7	5.56	3.87
	10:00:00	1	5cm	31.9	5.76	8.19
		1	20cm	32.3	6.24	8.59
		2	5cm	32	5.6	7.56
		2	20cm	31.9	5.7	7.21
		3	5cm	32.1	5.4	8.76
		3	20cm	32	5.4	8.71
	14:00:00	1	5cm	35	5.58	9.67
		1	20cm	34.8	5.64	8.69
		2	5cm	35.2	5.62	9.01
		2	20cm	35.3	5.66	9.03
		3	5cm	35.6	5.53	9.74
		3	20cm	35.6	5.78	10.17
	18:00:00	1	5cm	31.5	5.6	8.35
		1	20cm	31.9	6	7.76
		2	5cm	31.6	5.64	8.67
		2	20cm	31.8	5.6	8.65
		3	5cm	31.4	5.45	6.56
		3	20cm	31.7	5.63	6.55
Day7	06:00:00	1	5cm	28.2	5.58	3.49
		1	20cm	28.3	5.53	3.42
		2	5cm	28.3	5.27	3.24
		2	20cm	38.4	5.23	3.33
		3	5cm	28.2	5.19	3.65
		3	20cm	28.3	5.28	3.5
	10:00:00	1	5cm	32.3	5.56	7.7
		1	20cm	31.8	5.5	7.73
		2	5cm	33.1	5.47	7.44
		2	20cm	31.9	5.34	6.22
		3	5cm	32.4	5.37	6.47
		3	20cm	32.2	5.32	6.4
	14:00:00	1	5cm	33.4	5.66	9.63
		1	20cm	33.8	5.49	9.54
		2	5cm	34	5.39	9.47
		2	20cm	34.1	5.37	9.04
		3	5cm	33.5	5.3	9.18
		3	20cm	33.7	5.31	9.1
	18:00:00	1	5cm	31.9	5.84	7.68
		1	20cm	32.1	5.72	8.65
		2	5cm	31.9	5.43	8.27
		2	20cm	32	5.39	8.64
		3	5cm	31.7	5.43	8.39
		3	20cm	31.9	5.32	8.52
Day8	06:00:00	1	5cm	28.6	5.4	3.16
		1	20cm	28.5	5.4	3.5
		2	5cm	28.6	5.27	3.03
		2	20cm	28.6	5.35	2.96
		3	5cm	28.6	5.27	2.81
		3	20cm	28.6	5.33	2.83
	10:00:00	1	5cm	31.6	5.54	7.28
		1	20cm	31.3	5.62	15.89
		2	5cm	31.3	5.4	7.28
		2	20cm	31	5.45	7.95
		3	5cm	31.4	5.28	5.03
		3	20cm	31	5.28	7.7
	14:00:00	1	5cm	35.8	5.53	7.3
		1	20cm	35.2	5.31	5.69
		2	5cm	35.7	5.27	7.07
		2	20cm	35	5.28	6.54
		3	5cm	35	5.21	6.76
		3	20cm	34.3	5.09	6.3
	18:00:00	1	5cm	30.4	5.8	5.45
		1	20cm	30.8	5.58	4.45
		2	5cm	31	5.54	6.61
		2	20cm	31.1	5.37	5.95
		3	5cm	31	5.43	5.71
		3	20cm	31.1	5.32	5.86
Day9	06:00:00	1	5cm	26.7	6.07	4.97
		1	20cm	26.7	6.02	4.06
		2	5cm	26.6	5.91	4.78
		2	20cm	26.7	6.18	4.67
		3	5cm	26.7	5.95	4.71
		3	20cm	26.8	5.83	4.99
	10:00:00	1	5cm	32.2	6.3	7.86
		1	20cm	31.9	5.98	7.76
		2	5cm	31.8	5.88	7.97
		2	20cm	32.1	6.13	7.7
		3	5cm	32	6.11	8.08
		3	20cm	32.1	6.02	7.71
	14:00:00	1	5cm	35.7	6.24	6.37
		1	20cm	35.6	5.96	5.65
		2	5cm	35.7	5.89	6.42
		2	20cm	36.1	5.89	5.41
		3	5cm	36.1	5.95	6.16
		3	20cm	36.1	5.98	5.87
	18:00:00	1	5cm	33.8	6.61	7.86
		1	20cm	34.3	6.45	6.98
		2	5cm	34.8	6.59	6.7
		2	20cm	34.9	6.4	5.84
		3	5cm	34.1	6.31	4.28
		3	20cm	33.9	6.07	4.37
Day10	06:00:00	1	5cm	25.4	6.43	0.79
		1	20cm	25.6	6.42	0.78
		2	5cm	25.1	6.55	4.56
		2	20cm	25.3	6.51	3.49
		3	5cm	26.2	5.99	0.78
		3	20cm	26.3	5.91	0.54
	10:00:00	1	5cm	31.5	6.29	0.61
		1	20cm	30.6	6.25	1.18
		2	5cm	32.7	6.61	10.59
		2	20cm	32	6.57	10.37
		3	5cm	29.7	5.85	3.21
		3	20cm	28.7	5.7	0.52
	14:00:00	1	5cm	34.3	6.29	3.61
		1	20cm	34.1	6.28	3.53
		2	5cm	34.7	6.66	10.19
		2	20cm	34.9	6.46	10.84
		3	5cm	33.2	6.02	9.13
		3	20cm	30.9	5.67	4.69
	18:00:00	1	5cm	33.2	6.36	4.25
		1	20cm	33.5	6.42	4.13
		2	5cm	32.8	6.7	8.55
		2	20cm	33.2	6.54	8.82
		3	5cm	32.1	6.11	8.1
		3	20cm	31.1	5.78	1.93
Day11	06:00:00	1	5cm	28.4	5.92	0.3
		1	20cm	28.7	5.74	0.22
		2	5cm	29	6.48	0.14
		2	20cm	29.1	6.5	0.1
		3	5cm	28.6	5.82	0.48
		3	20cm	28.6	5.64	0.43
	10:00:00	1	5cm	30.5	5.69	2.78
		1	20cm	30.1	5.6	0.59
		2	5cm	30.4	6.33	0.99
		2	20cm	29.8	6.42	0.17
		3	5cm	29.7	5.64	0.94
		3	20cm	29.4	5.52	0.31
	14:00:00	1	5cm	34.3	5.82	10.09
		1	20cm	31.6	5.61	1.35
		2	5cm	32.1	6.35	0.3
		2	20cm	30.7	6.48	0.12
		3	5cm	30.3	5.62	1.43
		3	20cm	29.8	5.5	0.65
	18:00:00	1	5cm	33.2	5.74	7.02
		1	20cm	31.6	5.62	0.46
		2	5cm	32.6	6.34	0.98
		2	20cm	31.1	6.46	0.19
		3	5cm	29.9	5.64	0.72
		3	20cm	29.6	5.51	0.19
Day12	06:00:00	1	5cm	27.7	5.69	3.62
		1	20cm	27.8	5.55	3.62
		2	5cm	27.8	5.45	3.73
		2	20cm	27.8	5.44	3.55
		3	5cm	27.9	5.38	3.75
		3	20cm	27.8	5.37	3.73
	10:00:00	1	5cm	31	5.66	6.35
		1	20cm	30.6	5.48	7.26
		2	5cm	30.6	5.34	7.12
		2	20cm	30.6	5.37	7.93
		3	5cm	30.6	5.35	6.15
		3	20cm	30.5	5.35	7.65
	14:00:00	1	5cm	32.1	5.44	8.2
		1	20cm	32.1	5.33	8.14
		2	5cm	32	5.19	7.42
		2	20cm	32	5.17	7.35
		3	5cm	32	5.12	7.16
		3	20cm	32	5.15	7.19
	18:00:00	1	5cm	31.4	5.75	8.21
		1	20cm	31.5	5.56	7.56
		2	5cm	31.6	5.51	7.97
		2	20cm	31.6	5.47	7.25
		3	5cm	31.4	5.43	8.21
		3	20cm	31.6	5.36	6
Day13	06:00:00	1	5cm	28.2	5.44	3.59
		1	20cm	28.2	5.29	3.52
		2	5cm	28.2	5.25	2.88
		2	20cm	28.2	5.27	2.86
		3	5cm	28.1	5.2	3.11
		3	20cm	28.1	5.26	3.17
	10:00:00	1	5cm	31.9	5.51	7.17
		1	20cm	31.7	5.47	6.49
		2	5cm	32	5.45	8.76
		2	20cm	32.2	5.6	8.17
		3	5cm	32.1	5.48	7.96
		3	20cm	31.9	5.46	8.03
	14:00:00	1	5cm	34.9	5.54	8.15
		1	20cm	33.9	5.17	6.13
		2	5cm	34.8	5.36	8.84
		2	20cm	35	5.32	8.04
		3	5cm	35.2	5.4	9.03
		3	20cm	35.1	5.39	8.78
	18:00:00	1	5cm	34	5.57	7.17
		1	20cm	33.7	5.39	5.39
		2	5cm	34	5.36	6.74
		2	20cm	34	5.32	6.17
		3	5cm	34.1	5.35	8.31
		3	20cm	34.2	5.41	7.93
Day14	06:00:00	1	5cm	28.9	5.39	2.51
		1	20cm	28.9	5.24	2.55
		2	5cm	28.5	5.36	3.1
		2	20cm	28.6	5.23	3.06
		3	5cm	28.5	5.26	3.35
		3	20cm	28.6	5.28	3.29
	10:00:00	1	5cm	33.1	5.7	7.43
		1	20cm	33.1	5.61	6.99
		2	5cm	32.4	5.43	7.66
		2	20cm	32.5	5.32	7.22
		3	5cm	32.5	5.35	7.63
		3	20cm	32.7	5.34	7.77
	14:00:00	1	5cm	36.1	5.73	8.75
		1	20cm	36	5.53	8.72
		2	5cm	35.8	5.45	9.54
		2	20cm	35.5	5.39	11.03
		3	5cm	35.8	5.46	12.91
		3	20cm	35.6	5.41	12.69
	18:00:00	1	5cm	34.8	5.76	7.29
		1	20cm	34.8	5.6	7.14
		2	5cm	34.7	5.47	8.02
		2	20cm	34.7	5.4	7.93
		3	5cm	34.8	5.36	10.45
		3	20cm	34.8	5.45	10.26
Day15	06:00:00	1	5cm	28.8	5.56	3.11
		1	20cm	28.8	5.49	3.11
		2	5cm	28.6	5.4	3.36
		2	20cm	28.6	5.44	3.28
		3	5cm	28.5	5.43	3.36
		3	20cm	28.6	5.4	3.33
	10:00:00	1	5cm	32.1	5.66	5.75
		1	20cm	32.1	5.65	7.23
		2	5cm	32.1	5.61	7.85
		2	20cm	32.2	5.61	7.49
		3	5cm	32	5.53	7.12
		3	20cm	32	5.55	7.05
	14:00:00	1	5cm	34.1	5.57	6.1
		1	20cm	33.6	5.4	4.32
		2	5cm	34	5.55	6.57
		2	20cm	34	5.52	5.55
		3	5cm	33.8	5.49	6.47
		3	20cm	33.8	5.53	6.48
	18:00:00	1	5cm	32.8	5.66	6.29
		1	20cm	32.8	5.51	5.07
		2	5cm	33	5.46	6.76
		2	20cm	33	5.52	6.63
		3	5cm	32.8	5.56	6.78
		3	20cm	32.9	5.51	6.69
Day16	06:00:00	1	5cm	26.2	5.37	0.81
		1	20cm	26.2	5.38	0.74
		2	5cm	26.6	5.35	3.63
		2	20cm	26.4	5.34	3.65
		3	5cm	26.4	5.35	0.33
		3	20cm	26.5	5.35	0.29
	10:00:00	1	5cm	30	5.7	2.71
		1	20cm	29.5	5.41	0.81
		2	5cm	30.3	5.99	7.19
		2	20cm	30.2	5.99	7.12
		3	5cm	29.6	5.53	1.13
		3	20cm	29.1	5.51	0.57
	14:00:00	1	5cm	33	5.62	5.59
		1	20cm	30.9	5.38	0.7
		2	5cm	34	5.9	8.28
		2	20cm	34.4	5.98	8.92
		3	5cm	31.7	5.58	4.43
		3	20cm	30.5	5.49	1.48
	18:00:00	1	5cm	32.1	5.9	7.03
		1	20cm	30.1	5.42	0.52
		2	5cm	33.4	6.1	7.23
		2	20cm	33.6	6.1	7.34
		3	5cm	30.4	5.51	3.94
		3	20cm	30.1	5.41	0.53
Day17	06:00:00	1	5cm	28.5	5.43	0.62
		1	20cm	28.4	5.32	2.83
		2	5cm	28.3	5.41	2.69
		2	20cm	28.4	5.6	2.72
		3	5cm	28.1	5.62	3.23
		3	20cm	28.1	5.59	3.21
	10:00:00	1	5cm	31.8	5.45	7.04
		1	20cm	31.6	5.39	7.45
		2	5cm	32.1	5.44	7.39
		2	20cm	31.8	5.48	6.1
		3	5cm	31.9	5.6	7.83
		3	20cm	31.9	5.52	5.86
	14:00:00	1	5cm	35.8	5.36	6.98
		1	20cm	35	5.2	4.34
		2	5cm	36	5.45	7.5
		2	20cm	34.4	5.2	3.62
		3	5cm	36.2	5.59	7.98
		3	20cm	34	5.22	0.79
	18:00:00	1	5cm	33.5	5.13	5.18
		1	20cm	33.1	5.06	5.19
		2	5cm	33.3	5.21	6.68
		2	20cm	32.8	5.1	3.06
		3	5cm	33.4	5.35	6.71
		3	20cm	32.1	5.09	2.55
Day18	06:00:00	1	5cm	27.8	5.18	2.87
		1	20cm	27.9	5.1	2.81
		2	5cm	27.9	5.2	3.05
		2	20cm	27.8	5.25	3.07
		3	5cm	27.6	5.51	3.21
		3	20cm	27.8	5.42	3.14
	10:00:00	1	5cm	28.8	5.49	7.41
		1	20cm	28.8	5.5	7.59
		2	5cm	28.8	5.41	5.33
		2	20cm	28.7	5.36	5.17
		3	5cm	28.8	5.43	5.35
		3	20cm	28.7	5.45	5.31
	14:00:00	1	5cm	31.8	5.43	10.33
		1	20cm	31.9	5.49	10.73
		2	5cm	31.6	5.27	6.98
		2	20cm	31.6	5.19	6.83
		3	5cm	31.4	5.54	7.71
		3	20cm	31.6	5.3	6.77
	18:00:00	1	5cm	31.1	5.44	7.53
		1	20cm	31.1	5.48	7.42
		2	5cm	30.6	5.44	6.41
		2	20cm	30.9	5.39	6.69
		3	5cm	30.9	5.54	6.86
		3	20cm	30.9	5.47	6.17
Day19	06:00:00	1	5cm	28.1	5.34	3.47
		1	20cm	28	5.32	3.53
		2	5cm	27.9	5.35	3.59
		2	20cm	27.9	5.39	3.57
		3	5cm	28	5.47	3.65
		3	20cm	27.9	5.34	3.78
	10:00:00	1	5cm	30.8	5.34	5.9
		1	20cm	30.8	5.27	6.32
		2	5cm	30.9	5.44	6.11
		2	20cm	30.9	5.33	6.35
		3	5cm	30.9	5.58	6.56
		3	20cm	30.8	5.47	6.22
	14:00:00	1	5cm	32.8	5.35	6.69
		1	20cm	32.7	5.38	6.5
		2	5cm	33	5.47	6.46
		2	20cm	32.7	5.45	7.22
		3	5cm	32.9	5.66	7.35
		3	20cm	32.7	5.49	6.96
	18:00:00	1	5cm	31.2	5.51	7.09
		1	20cm	31.3	5.51	6.91
		2	5cm	31.1	5.51	6.63
		2	20cm	31.2	5.48	5.63
		3	5cm	31.2	5.8	7.32
		3	20cm	31.2	5.59	6.84
Day20	06:00:00	1	5cm	28.1	5.33	3.27
		1	20cm	28.2	5.35	3.26
		2	5cm	28.2	5.44	3.41
		2	20cm	28.3	5.37	3.34
		3	5cm	28.4	5.52	3.02
		3	20cm	28.4	5.49	2.9
	10:00:00	1	5cm	30.5	5.35	5.7
		1	20cm	30.3	5.3	6.27
		2	5cm	29.6	5.48	5.12
		2	20cm	29.8	5.18	6.09
		3	5cm	30.3	5.72	6.12
		3	20cm	30.1	5.6	5.58
	14:00:00	1	5cm	25.2	6.23	5.6
		1	20cm	25.5	6.15	5.24
		2	5cm	25.8	6.38	5.69
		2	20cm	25.9	6.19	5.23
		3	5cm	25.9	6.52	4.93
		3	20cm	25.6	6.42	4.61
	18:00:00	1	5cm	25.9	5.86	4.46
		1	20cm	26	5.81	4.05
		2	5cm	26.3	5.81	4.07
		2	20cm	26.4	5.76	4
		3	5cm	26.3	5.99	3.89
		3	20cm	26.3	5.85	3.76
Day21	06:00:00	1	5cm	26.5	5.52	3.1
		1	20cm	26.6	5.44	3.03
		2	5cm	26.3	5.6	3.22
		2	20cm	26.4	5.58	3.12
		3	5cm	26.3	5.66	3.21
		3	20cm	26.4	5.6	3.21
	10:00:00	1	5cm	28	5.47	6.01
		1	20cm	28	5.43	5.5
		2	5cm	27.9	5.56	6.3
		2	20cm	27.9	5.57	6.7
		3	5cm	27.8	5.66	5.67
		3	20cm	27.9	5.57	6.39
	14:00:00	1	5cm	30.9	5.48	7.51
		1	20cm	30.8	5.42	7.92
		2	5cm	30.7	5.64	8.7
		2	20cm	30.8	5.58	8.92
		3	5cm	30.6	5.74	8.56
		3	20cm	30.8	5.67	8.84
	18:00:00	1	5cm	29.8	5.32	6.18
		1	20cm	29.8	5.39	6.44
		2	5cm	29.8	5.51	7.32
		2	20cm	29.8	5.45	7.26
		3	5cm	29.6	5.7	7.33
		3	20cm	29.7	5.56	7.15
Day22	06:00:00	1	5cm	26.1	5.77	2.76
		1	20cm	26.3	5.73	3.19
		2	5cm	25.8	5.76	3.34
		2	20cm	25.9	5.75	3.58
		3	5cm	25.6	5.72	4.01
		3	20cm	25.6	5.74	3.86
	10:00:00	1	5cm	29.9	5.32	6.75
		1	20cm	29.9	5.3	6.75
		2	5cm	30	5.41	6.13
		2	20cm	29.7	5.36	6.35
		3	5cm	30.1	5.63	8.39
		3	20cm	29.9	5.56	6.83
	14:00:00	1	5cm	31.9	5.25	7.22
		1	20cm	31.7	5.18	6.41
		2	5cm	31.7	5.31	6.74
		2	20cm	31.7	5.19	6.04
		3	5cm	31.8	5.43	7.6
		3	20cm	31.5	5.28	4.42
	18:00:00	1	5cm	31.4	5.24	6.56
		1	20cm	31.3	5.15	5.04
		2	5cm	31.1	5.25	6.05
		2	20cm	31.2	5.19	6.11
		3	5cm	31	5.36	6.16
		3	20cm	31	5.25	5.68
Day23	06:00:00	1	5cm	28.1	5.27	3.03
		1	20cm	28.2	5.3	2.91
		2	5cm	28.2	5.28	3.13
		2	20cm	28.1	5.32	3.2
		3	5cm	28	5.45	3.03
		3	20cm	28	5.44	3.47
	10:00:00	1	5cm	30.5	5.3	8.33
		1	20cm	30.7	5.26	6.58
		2	5cm	30.4	5.28	5.19
		2	20cm	30.4	5.33	5.6
		3	5cm	30.3	5.52	5.85
		3	20cm	30.3	5.45	6.33
	14:00:00	1	5cm	33.4		7.42
		1	20cm	33.5	5.36	7.06
		2	5cm	33.1	5.43	6.11
		2	20cm	33	5.28	5.9
		3	5cm	33.1	5.59	7.26
		3	20cm	32.5	5.35	4.09
	18:00:00	1	5cm	31.5	5.37	6.23
		1	20cm	31.5	5.2	6.21
		2	5cm	31.3	5.34	5.87
		2	20cm	31.4	5.29	5.96
		3	5cm	31.2	5.66	6.45
		3	20cm	31.1	5.31	5.1
Day24	06:00:00	1	5cm	27.8	5.29	3.33
		1	20cm	27.9	5.4	3.25
		2	5cm	28	5.33	3.32
		2	20cm	28.1	5.28	3.22
		3	5cm	28.2	5.54	3.02
		3	20cm	28.3	5.45	3.02
	10:00:00	1	5cm	31.9		6.67
		1	20cm	32	5.29	7.07
		2	5cm	31.9	5.43	6.76
		2	20cm	32	5.41	6.75
		3	5cm	32.1	5.56	6.85
		3	20cm	32	5.39	6.31
	14:00:00	1	5cm	33.1	5.37	8.39
		1	20cm	33	5.31	8.35
		2	5cm	33.7	5.54	7.68
		2	20cm	33.2	5.39	7.48
		3	5cm	33.2	5.7	5.9
		3	20cm	33.5	5.63	3.9
	18:00:00	1	5cm	30.9	5.51	6.48
		1	20cm	31	5.45	6.46
		2	5cm	31	5.55	6.55
		2	20cm	31	5.47	6.39
		3	5cm	30.7	5.68	5.91
		3	20cm	30.8	5.55	5.42
