# Supplementary material for: Mismatches between the genetic and phenotypic sex in the wild Kou population of Nile tilapia Oreochromis niloticus
Source: PeerJ. 2019 Sep 18;7:e7709. doi: 10.7717/peerj.7709 (PMC6754722; doi:10.7717/peerj.7709)
Supplement: Table S4 — Raw data. [file peerj-07-7709-s006.xlsx]

## Sheet: Table S4 
Well water			Breeding			Eggs incubation			Sexual differenciation			Growing phase until sexing
Temp. (°C)	pH	Oxy. (mg/L)	Temp. (°C)	pH	Oxy. (mg/L)	Temp. (°C)	pH	Oxy. (mg/L)	Temp. (°C)	pH	Oxy. (mg/L)	Temp. (°C)	pH	Oxy. (mg/L)
28.8	5.01	4.39	29.5	5.05	5.49	27.9	6.13	7.6	27.4	7.82	6.32	28.3	7.37	-
29.3	5.94	5.58	29.6	5.25	5.06	27.9	6.44	7.69	27.2	7.25	7.05	28.8	6.49	-
29.5	5.37	4.64	29.7	5.43	5.77	27.9	6.66	7.7	26.7	7.19	5.69	29.1	6.82	-
29.4	6.01	5.4	29.8	5.31	5.57	27.9	6.83	7.71	27	6.82	6.06	28.3	8.87	-
28.4	5.94	5.24	30	5.42	6.09	28	6.97	7.69	27	6.66	5.92	27	8.43	-
29.6	5.32	4.71	29.1	6.34	6.4	27.9	7.14	7.68	27.6	6.06	7.21	27.6	8.54	-
29.4	5.89	4.94	29.4	5.4	5.32	26.4	7.02	7.88	27.52	6.94	7.19	27.4	8.31	-
29.2	5.85	5.6	29.5	6.72	6.23	26.4	7.13	7.91	27.1	6.61	6.44	26.8	7.16	-
28.9	5.23	5.6	30.1	6.09	6.45	26.5	7.03	7.92	25	7.28	6.73	27.3	7.03	-
27	5.57	5.8	30.2	6.01	6.27	26.6	6.95	7.91	26.5	7.42	7.22	28.2	7.38	-
28.2	5.26	5.93	30.2	6.15	6	27.6	6.99	7.66	26	7.5	7.4	28.3	7.17	-
27.4	5.34	6.09	28.9	5.26	4.45	27.5	7.08	7.4	26.2	7.15	6.88	27.6	7.03	-
29.1	5.18	5.71	29.4	5.44	5.51	27.7	7.08	7.66	26.6	7.5	6.8	27.8	6.98	-
29.1	5.17	5.83	29.2	6.02	6.12	26.7	6.88	7.81	26.8	6.45	7.15	26.7	8.06	-
29	5.25	5.63	29.4	6.17	6.1	26.8	6.62	7.74	27.7	6.3	4.64	27	6.96	-
28.7	5.12	5.85	28.6	6.51	5.92	27.2	6.76	7.65	25.6	7.2	6.19	26.4	8.49	-
28.6	5.23	5.89	29.1	6.78	6.3	27.6	7.56	7.68	26.7	7.22	6.39	26.9	8.01	-
28.8	5.44	5.77	28.7	6.26	1.58	26.1	7.47	7.9	26.2	7.63	6.72	27	7.51	-
29.1	5.07	5.66	28.8	5.83	4.85	26.5	6.8	7.67	29.5	6.93	6.2	27.2	7.68	-
26.9	5.08	5.79	28.6	5.98	6.29	27.4	6	7.44	28.2	7.32	6.62	27.1	7.67	-
28.2	5.24	5.81	29.2	5.84	6.29	26.1	6.8	7.75	27.6	7.4	5.87	27.6	6.95	-
28.8	5.19	5.39	29.4	6.11	6.44	26.8	6.5	7.57	28.3	6.74	6.98	26.7	7.34	-
29.4	4.82	5.57	29.7	6.29	6.17	27.5	6.62	7.53	29	6.39	5.45	27.4	7.15	-
28.1	5.18	6.1	29.9	6.46	6.3	27.1	6.76	7.63	27.2	7.06	6.88	27.3	7.05	-
29.1	5.18	5.44	29.9	6.51	6.53	27.2	7.37	7.57	28.4	7.25	7.14	27.7	6.97	-
28.3	5.22	5.93	29.1	6.67	6.69	27.5	6.85	7.55	29.1	6.81	7	28.9	8.15	-
28.7	5.07	5.82	28.9	5.79	6.62	26.6	6.35	7.69	27.7	6.98	7.06	28.9	6.94	-
28.4	5.28	5.85	29.3	6.11	6.57	27	6.18	7.55	28.7	6.89	6.89	29.3	8.34	-
28.8	5.28	5.75	29.7	6.48	6.46	26.1	6.11	6.55	28	7	6.93	29.8	8.02	-
28.3	5.3	6.15	29.9	6.61	6.46	27.3	6.65	7.51	29	8.22	6.98	27.7	7.53	-
28.5	5.14	5.31	30.1	6.62	6.36	26.4	6.13	7.65	28.9	7.45	6.52	27.6	7.69	-
26	5.25	6.34	29.4	5.4	5.8	27.7	6.74	7.39	28.5	7.14	6.42	29.2	7.65	-
27.8	5.22	5.98	29.6	5.49	6.75	27.4	6.45	7.35	27.9	7.31	6.51	28.5	7.57	-
28	5.14	5.99	29.6	5.85	7.08	27.1	6.58	6.62	27.6	8.02	7.03	29.5	7.64	-
27.7	5.08	5.85	29.8	6.1	7.13	27.2	6.81	7.49	27.2	7.45	6.57	28	6.8	6.7
28.9	5.58	5.87	29.9	6.23	7.11	27.2	6.03	7.43	26.7	7.15	6.46	29	7	6.86
28	5.33	5.96	30.4	6.48	7.06	27.5	6.59	7.49	27	6.85	6.26	30	7.2	6.73
28.2	5.28	5.9	30.5	6.52	7.06	27	6	7.4	27	6.73	6.93	29.5	7.6	7.02
29.6	5.26	5.57	29	6.58	7.26	27.2	6.6	7.48	27.8	6.07	6.51	30	7.3	5.9
28.3	5.29	5.88	28.9	5.56	6.86	27.6	6.35	7.3	27.3	7.04	6.63	29	7.6	6.57
29.5	5.24	4.73	29.1	6.1	7.1	26.8	6.55	7.32	27.2	6.73	6.4	29	7.2	6.55
29.9	5.2	5.61	29.2	6.24	7.09	26.7	6.68	7.29	26	7.37	6.68	28	7.1	6.24
27.2	5.48	6.06	29.4	6.37	7.04	27.4	6.71	7.4	26.9	7.69	6.74	29	7.8	6.74
26.7	5.39	6	29.7	6.72	6.96	26.4	6.56	7.65	26.1	7.34	6.32	29	7	6.78
27.5	5.3	5.78	29.9	6.54	6.98	26.8	6.27	7.51	26.8	7	7.08	29	7.7	6.47
28.7	5.29	5.8	29.9	6.53	6.98	27.3	6.47	7.27	26.3	7.32	6.85	30	6.5	6.32
28.3	5.38	5.56	28.8	6.66	7.35	26.6	6.36	7.54	26.9	7.25	6.21	30	7.4	6.06
27.7	5.31	5.72	28.8	6.42	7.27	26.8	6.34	7.28	27.8	6.33	6.54	29	7.3	6.22
27.2	5.95	5.57	28.9	6.46	7.26	27.5	6.27	7.21	26.6	7.31	6.31	30	7.1	4.75
28.7	5.28	5.8	29.1	7.45	7.26	26.1	5.73	7.64	26.8	7.3	6.65	29	7.4	6.42
28.5	5.49	5.85	29.3	7.49	7.24	27	5.78	7.48	26.3	7.67	6.85	30.5	7.2	6.02
28.2	5.37	5.92	29.5	7.45	7.26	27.7	5.53	7.27	28.3	7.05	6.92	30	6.9	6.78
28	5.4	5.8	29.6	7.41	7.37	27	5.64	7.34	28.2	7.52	6.5	30	6.2	5.96
28.3	5.35	5.94	29.4	5.23	6.45	27.1	6.15	7.34	27.7	7.12	6.74	30	6.9	6.61
28.4	5.37	5.94	29.4	5.7	7.32	27	6.09	7.42	28.5	6.6	6.52	30	6.8	6.25
28.2	5.3	5.92	29.4	6.08	7.43	27.9	6.11	7.28	29.2	6.46	6.7	31	7.4	5.98
27.5	5.14	6	29.7	6.49	7.42	26.1	5.32	7.67	27.6	7.12	6.4	29.5	7.5	5.62
28.5	5.2	5.73	29.7	6.51	7.4	26.9	5.35	7.42	27.7	7.24	7.11	29	6.4	5.56
28.6	5.09	5.67	29.7	6.6	7.39	26.1	5.11	7.4	28.7	6.83	6.91	29	6.4	5.58
28.3	5.21	5.6	29.9	6.7	7.38	26.7	5.33	7.29	27.8	6.81	6.46	29	7.2	4.96
28.5	5.41	5.94	28.4	6.8	7.59	26.8	5.4	7.3	28.9	6.69	6.73	28	7.1	5.16
28.1	6.3	6	28.6	6.14	7.3	27.2	5.54	7.22	29.4	7.56	6.78	31	6.9	4.81
27.5	5.39	5.96	28.6	6.46	7.55	26.8	4.86	7.51	28.8	7.07	6.68	30.5	7	5.13
29.3	5.4	5.79	28.6	6.28	7.47	27.6	5.17	6.87	28.7	7.06	6.92	29	7.1	4.8
29.1	5.14	5.33	28.8	6.5	7.51	27.5	5.5	7.11	27.9	7.43	6.54	29	7.4	4.87
29	5.27	5.75	28.9	6.66	7.53	26.2	5.12	7.54	28.9	7.2	6.62	29	6.9	3.91
29	5.27	5.45	29.4	5.66	7.03	26.4	4.93	7.41	27	7.04	6.37	31	7.3	5.66
28.9	5.21	5.81	28	5.76	7.39	26.7	5.25	7.17	27.7	7.14	6.42	30.5	7	4.97
28.6	5.45	5.83	28.2	6.74	7.73	27.5	6.15	7.41	27.5	8.07	6.55	30.5	7.2	3.81
29.3	5.85	6.69	29.4	6.66	7.69	27.2	4.48	7.39	28.4	6.93	6.37	30	7.3	5.24
28.9	5.25	5.71	30.2	6.75	6.73	27.1	5.31	7.22	28.7	8.33	6.9	29	7.3	5.27
28.9	5.33	5.59	29.5	6.73	7.45	27.6	5.8	7.62	29.1	7.93	6.7	29	6.9	4.96
27.6	5.41	5.85	29.6	6.86	7.46	27.2	6.84	7.35	28.2	7.62	6.76	29	7.4	4.9
28.9	5.3	5.75	29.9	7.14	7.44	26.9	6.8	7.66	27.1	7.66	6.68	30	7.7	4.15
28.8	5.28	5.37	30	7.17	7.42	28.5	5.56	6.47	27.6	7.67	6.88	31	7.1	4.74
28.2	5.73	5.98	29.4	6.02	7.39	28.6	5.8	7.12	28.9	7.02	7.16	31	7.2	4.51
28.1	6.3	5.98	29.4	5.16	6.23	27.9	6.7	7.24	28	7.45	6.74	30	6.9	2.15
28.9	5.94	5.22	30	7.02	7.34	27.2	6.58	7.21	29.1	7.19	7.12	28	6.9	3.91
28.7	5.52	5.88	30.5	7.02	7.26	27.4	5.52	5.88	27	6.97	6.9	28.9	6.1	5.1
29	5.2	5.86	30	7.05	7.37	27	6.29	7.15	27.7	7.09	6.54	29	7.2	5.38
29.8	5.41	5.54	28.7	7.02	7.54	26.8	6.73	7.07	27.5	8.11	6.91	29	7.3	4.68
28.9	5.4	5.91	28.5	7.02	7.59	29.6	5.3	5.57	28.4	6.94	6.64	29.5	7.1	4.92
28.8	5.38	6	28.9	6.4	7.47	27.2	7.13	7.45	28.8	8.37	6.64	28.5	7.4	5.18
25.7	5.25	6.74	29	6.89	7.43	26.6	7.25	7.28	29.1	7.96	6.81	30	7.6	4.84
29	5.27	5.84	28.4	7.25	6.92	27.4	6.88	7.03	28.3	7.64	6.85	29.5	7.5	5.24
28.6	5.16	5.7	28.5	6.32	7.12	26.6	7.34	7.16	27	7.67	6.72	30	6.5	5.45
29	5.25	4.8	28.2	8.04	6.95	29.6	5.29	5.4	27.6	7.71	6.53	29	7.2	6.37
27.7	5.37	6.07	28.9	5.99	6.98	27.3	5.3	5.77	27.4	7.44	6.8	28	6.8	6.06
28.7	5.84	5.88	29.2	8.11	6.84	27	7.18	7.4	27.3	6.83	6.85	29	7.1	6.59
28	5.39	6.76	29.2	5.56	6.7	25.5	7.3	7.69	26.4	6.82	6.24	29	7.5	6
28.1	5.42	6.54	29.1	7.78	7.14	26	7.29	7.59	27.2	6.75	6.76	28.5	6.7	6.03
28.3	5.52	6.47	29.2	5.79	7.06	24.9	7.06	7.68	26.8	6.56	6.69	27	7.6	6.18
28.2	5.74	6.54	29.4	8.51	7.07	24.8	7.04	7.4	27.8	6.8	6.26	28.5	7.2	6.03
29.1	5.26	5.69	28.2	5.58	6.94	24.8	7.34	7.77	27.2	6.71	6.45	28	7.3	4.6
28.6	5.13	5.63	27.8	8.01	7.16	26.4	6.43	7.22	27.1	6.37	6.54	29	7.2	4.92
28.8	5.22	5.77	28.3	5.79	7.09	26.3	7.09	7.17	25.6	7.02	6.37	29	6.6	5.56
28.2	5.24	6.02	28	6.42	6.91	26.5	5.95	6.93	26.4	7.26	6.94	30	7.5	3.08
29	5.56	5.65	28.6	6.57	6.99	26.3	6.47	7.06	25.9	7	6.52	31	7.1	4.21
27.3	5.29	5.93	28.5	6.01	5.7	28.1	5.93	6.79	26.5	6.57	6.45	30	6.5	3.52
28.9	5.77	5.89	28.2	6.05	5.34	28	5.62	6.48	26	6.98	7.19	29	7.2	5.26
29.2	5.83	5.73	28.5	5.93	5.9	27.8	6.3	6.75	27.2	6.08	6.59	29.5	7.3	2.8
27	4.9	6.15	27.8	6.41	5.92	27.6	6.65	6.86	26.5	6.99	6.71	31	7.7	3.04
27	5.3	5.4	28.4	5.94	6.1	27.1	6.98	6.73	27.5	6.42	6.5	30	7.3	5.75
26	5.3	-	27.8	6.07	6.19	27.2	7.07	6.78	25.5	7.36	6.51	30	6.9	5.69
27	6	7.71	28.5	7	6.19	27.2	7.04	6.95	26.7	7.06	6.54	29	7.1	5.59
27	5.6	4.87	28.4	6.89	7.07	27.3	6.29	6.67	26.1	7.59	6.3	30	7.2	4.41
27	5.7	7.56				27	6.91	6.49	29.7	6.69	6.87	29	6.9	5.5
27.5	5.5	-				26.6	7.07	6.43	28.6	7.45	6.7	29	7.3	3.56
28	5.5	-				26.6	7.1	6.53	29.1	7.01	5.76	29	6.6	5.01
26	5.6	-				27	6.31	6.3	27.8	6.98	6.38	31	6.8	3.74
26	5.4	-				28.5	5.68	6.46	28.3	6.5	5.94	29.5	7	3.66
26	6.5	7.13				27.6	6.67	6.25	29.5	6	4.8	30	7.1	3.54
27	6.5	-				27.7	6.8	6.84	28.4	6.99	4.45	30.5	7.2	2.95
27	7.2	6.2				27	6.91	6.02	28.9	7.15	5.15	30	7.5	3.5
27	6.7	5.96				27.2	6.9	5.91	28.2	7.07	4.5	30	7	3.11
24	6.8	-				29.2	6.86	6.38	28.1	6.74	5.68	30.5	7.4	3.09
28.5	6.7	-				29	5.52	5.34	29	7.04	5.7	30	7.3	3.24
26	6.6	-				28.8	5.97	6.04	29	8.38	6.78	30	7.1	3.59
26	6.8	-				28.5	6.04	6.8	29.2	7.44	7.19	30.5	7.4	3.43
26	6.8	-				28.7	5.99	6.48	27.3	8.62	6.61	28	7.2	4.22
25	6.9	5.97				27.3	6.55	6.73	28.1	7.64	6.39	29	7.3	3.52
25	7.1	4.86				28.4	6.6	7	27.9	7.59	6.8	29	7.1	2.89
26	6.6	-				28.7	6.65	7.02	29.2	7.09	6.87	30.5	7.1	2.72
24	6.3	-				26.7	6.96	6.57	28.4	7.18	6.7	30	7.5	1.32
28	6.1	-				27.1	6.29	7	29.1	7.15	6.86	30	7	3.21
28	6.5	-				26.8	6.97	5.53	27.3	7.47	6.85	30.5	6.9	3.09
27.2	6.5	-				27.2	6.43	6.95	28	7.16	6.65	29	7.8	2.82
25	7.3	-				27.1	6.94	5.42	27.7	8.69	6.08	30	7	3.04
28	6.2	-				27.2	6.42	6.57	28.8	7.28	6.32	30	7.1	3.14
26.5	6.4	4.83				28.6	5.75	7.21	27.7	8.32	6.53	30.5	7.2	2.02
28	6.3	-				27.7	6.72	7.41	29.4	8	6.34	30	6.9	1.77
27.5	6.1	4.29				28.7	5.31	6.86	28.5	7.98	6.73	29.5	7.6	1.72
27	6.6	6.96				29	6.14	6.76	27.2	7.85	6.75	29	7.5	3.24
27	6.5	6.45				29.6	6.05	6.95	29.3	7.52	6.7	30	7.2	2.85
27	6.5	6.27				28.4	5.86	7.09	29.1	7.04	6.4	30	7	6.96
27	6.3	5.4				28.7	6.74	7.12	28.4	7.06	6.6	30	7.9	6.68
25.5	6.6	6.48				28.5	6.98	7.06	29.1	7.3	5.88	29.5	7	6.53
27	6.6	4.18				28.6	7.07	7.12	27.3	7.33	6.78	31	7.8	6.42
27	6.4	5.89				28	5.96	7.14	28.1	7.14	6.82	30	7.3	6.68
27.5	6.4	6.03				28	7.6	7.08	28.1	8.81	6.66	30	7.3	6.14
27	6.3	5.49				28.2	7.11	7.35	28.9	7.36	7	29	7.4	6.57
29	6.1	3.88				27.6	7.5	7.23	28.2	8.56	4.06	31	7.2	6
27	6.4	4.16				27.3	7.07	7.18	29.7	7.54	6.64	30	6.9	6.75
29	6.4	7.86				28	7.23	7.25	28.7	7.97	6.85	30	6.7	6.12
27	6.2	4.32				27	6.06	6.81	27.4	8.05	7.1	30	7	6.83
28	6.1	4.41				27.9	6.46	7.03	29.1	7.77	6.94	30	6.9	6.28
28	6.6	4.33				27.7	6.13	7.16	27.4	7.59	7.06	30	7.4	6.21
29	6.7	4.06				27.9	5.71	6.9	28.8	8.37	7.1	29	6.6	6.02
29	7	4.4				27.5	6.36	7.06	27.2	7.4	7.07	29	6.9	5.98
29	6.3	4.51				26.8	5.91	6.68	28	8.78	6.44	29	6.7	5.89
28	6.3	4.18				28.2	5.8	5.66	27.5	7.47	6.95	29	7.4	4.25
28.5	6.1	4.14				27.2	6.66	7.12	29.3	7.59	6.81	29	7.2	5.67
29	6.5	4.76				27.7	5.33	6.32	28.5	6.84	7	30.5	7.3	5.17
29	6.4	4.21				28	5.43	6.84	29.6	7.28	6.97	30.5	7	5.46
29	6.3	4.13				28	6.53	6.66	27.2	7.19	6.45	29	7.1	5
29	6.3	4.08				28.1	6.57	6.82	28.1	7.53	7.08	29	7.2	4.66
29	6.7	6.65				28	5.85	6.93	27.6	7.21	7.04	30	7.1	5.63
29	6.3	6.28				27.2	6.59	6.8	28.7	8.63	6.64	31	7.2	5.33
28	6.8	6.02				27.8	6.31	6.85	27.9	7.24	7.03	31	7.1	5.14
28	6.3	5.82				27.4	6.43	6.56	29.1	8.49	7.17	30.5	7.1	5.2
28	6.4	6.26				27.6	6.12	6.34	28.2	8.2	6.92	31	7.4	5.5
28	6.5	5.06				27.9	6.48	6.03	27.2	8	7.42	29	7.2	5.21
28	6.4	6.51				27.4	5.63	6.65	28	8.02	6.65	29	7	5.72
29	6.3	4.67				27.7	5.88	6.89	28.3	7.34	7.08	30	7.5	5.18
29	6.5	5.02				27.6	6.36	6.9	29.1	8.62	6.42	31	8	5.27
29	6.3	4.3				27.4	6.47	6.76	29.4	8.31	7.05	30	7.1	4.75
29	5.7	5.98				27.6	5.84	5.67	27.1	7.34	6.74	31	6.7	4.58
29	6.5	6.84				27.3	6.22	4.81	27.2	7.33	7.18	31	7	4.93
27	6.4	6.5				27.5	5.87	6.47	29.1	7.88	6.83	28	6.9	3.42
27	6.9	4.65				28	5.75	6.9	28.5	6.71	7.54	29	6.4	5.34
28	6.9	4.09				27.8	8.12	7.09	29.3	7.51	7.18	29	6.8	5.25
28	7.1	6.69				27.4	5.99	7.2	27.2	7.11	7.1	29	7.1	4.5
27	6.8	6.28				26.9	8.05	7.07	29.1	7.62	7.22	29	7	4.85
29	5.2	6.35				28.1	5.8	6.91	28.5	7.13	6.99	29.5	7.1	5.25
29	5	4.15				27.9	6.36	6.83	29.3	8.49	7	30	7.7	5.93
27	6.5	6.03				28.4	5.44	6.61	27.2	7.05	7.17	29	7.1	6.62
28	6.8	4.2				27.7	6.19	6.64	28.4	8.31	6.81	29	7	6.04
29	6.6	3.76				28	5.43	6.64	27.7	7.98	6.46	30	7.6	5.98
29	6.6	3.94				27.6	6.9	6.41	28.9	7.99	7.05	29	6.9	6.32
27	7	4.38				29.7	5.48	5.94	28.1	7.44	6.51	30.5	7.6	5.84
26	6.6	6.21				28.7	7.62	6.48	29.8	7.06	6.83	29	7.6	6.23
28	6.5	4.29				25.8	6.54	7.15	28.3	7.02	6.79	30	7.7	6.09
27	6.5	4.5				27.4	6.05	6.69	27.6	6.82	7.25	30	7.4	6.03
27.5	6.5	4.25				27	6.39	6.46	29.5	6.32	7.07	30	6.9	6.15
29	6.8	4.08				28	6.78	6.68	27	6.43	6.84	30	7.2	4.96
26	6.8	6.35				28.1	6.76	6.53	26.7	6.85	6.87	29	7.2	6.16
27	6.4	4.2				28.4	5.98	6.02	27.7	6.65	7.4	30	7.1	5.27
28.5	6.7	4.36				28.2	6.72	6.54	28.2	6.68	6.1	30	7.4	6.37
29	6.7	4.6				28.3	6.24	5.98	27.7	7.15	6.84	29	6.5	3.87
28.5	7.2	3.98				28.3	6.04	6.64	27.8	7.01	7	29	7.1	4.57
28	6.9	4.36				28.4	6.47	5.78	26	6.87	6.46	29.5	7.2	4.39
29	6.6	4.19				28.2	5.63	5.77	27	7.53	7.33	30	7.2	4.36
29	6.5	4.46				28.4	6.14	5.55	26.3	7.44	6.49	29.5	7.3	4.55
29	6.4	4.8				28	5.8	5.73	27	7.47	7.31	30	7.5	5.72
29	6.9	3.97				28.1	5.74	5.81	26.8	7.34	6.75	30	6.9	3.67
29	6.6	4.02				26.6	6,95	7,14	27.1	7.95	6.89	30	7.1	2.47
29	6.7	4.41				27.7	5,47	7,07	27.7	7.12	6.82	30	7.4	4.81
28.5	6.6	4.72				27.2	6,83	6,96	26.8	6.58	7.3	30	7.2	5.26
29	6.5	5.09				26.9	6,88	6,86	27.4	6.74	6.87	30	7.3	3.87
29	6.6	4.49				26.9	6,91	7,18	27.2	8.19	6.89	31	7.2	3.83
29	6.8	4.61				26.9	7,67	7,22	27.4	8.3	6.7	29	7.1	2.18
30	6.7	3.98				27.5	6,75	7,31	28	8.07	6.78	30	6.9	3.29
29.5	6.9	3.87				27.5	6,39	7,07	28.9	7.14	7.02	30	7.5	3.46
29	6.6	4.2				27.5	6,52	7,1	29.5	6.74	7.13	30.5	7.6	3.54
28.5	6.5	4.9				27.5	6,25	6,89	29.8	7.45	7.22	31	7.2	2.91
30	6.6	5.06				26.9	6,56	7,17	27.7	7.24	7.33	31	7.5	2.7
29.8	6.8	5.24				28.9	6,16	7,05	27.1	7.27	6.93	31	6.8	2.83
30	5.5	4.03				28.2	6,31	6,96	29.3	8.18	7.1	30.5	7.6	2.68
30	6	4.36				28.2	6,29	6,92	28.4	7.62	7.05	30	7.3	3.5
29	6	4.47				28.2	6,02	7,42	29.5	7.87	7.44	30	7.1	2.9
29	6	4.51				27	5,34	7,09	29.3	8.02	7.18	31	7.3	2.5
29.5	6.2	4.77				27.4	5,84	7,02	28.2	7	6.99	30.5	6.8	2.5
29.5	6.3	4.66				27.8	5,57	6,83	29.5	6.95	6.85	30.5	7.3	2.16
29	7.2	5.78				27.3	4,99	7,06	29.8	6.72	6.74	30	7.2	5.3
29.5	6.1	4.19				27.2	4,89	6,72	28.5	6.29	7	30.5	7.2	5.25
29	5.7	4.28				26.6	4,6	7,03	29	6.25	7.05	29	7	4.89
29.5	5.4	4.11				26.8	4,82	6,88	27.7	7.01	6.83	31	7.4	5.5
30	6.7	6.96				26.8	7,27	6,87	27.4	8.53	7.25	30	7.2	6.1
30	4.9	4.48				26.8	7,15	6,97	26.9	6.5	7.07	31	7.2	6.58
30	5.2	4.08				26.9	7,12	7,38	27.5	6.31	6.87	31	7.4	6.1
29	5.9	4.61				27.2	7,18	7,72	27.8	6.63	7.1	30	7.1	6.66
29.7	5.6	4.06				27.1	7,29	6,84	28.7	6.62	6.1	30	7.3	6.41
29.5	5.5	4.28				27.2	6,99	7,29	27.6	6.88	7	30	7	6.55
29.5	5.5	3.87				27.2	6,21	7,06	27.8	6.88	7.33	29	6.7	5.65
29	5.6	4.61				27	7,23	7,05	26.3	6.93	7.31	29	6.6	6.19
28	5.5	4.83				26.9	7,31	7,1	27	7.98	6.89	29.5	7.3	4.44
30	5.2	4.55				27.1	7,23	7,5	27	7.44	7.3	29.5	6.9	5.76
29	5.5	4.78				27.1	6,98	7,07	27.2	7.84	6.98	30.5	7.3	5.62
29	5.5	3.94				27.1	7,11	6,9	27.7	7.36	6.89	30	7	5.56
29	5.4	4.11				27.1	7,09	7,01	26.8	7.89	6.78	29	7	5.65
31	6.5	8.05				27.4	5,26	6,85	27.4	7	7.13	30	7	5.86
31	5.8	6.12				27.9	5,22	6,95	26.6	6.61	7.22	30	6.6	5.26
30	5.5	3.89				28.1	7,28	7,02	27.2	6.78	7.33	31	7.2	6.18
29	5.8	4.85				27.9	7,31	6,71	28.9	8.17	7.44	31.2	7.1	5.11
30.2	7	9.2				27.9	7,37	6,98	29.5	8.17	7.18	31.5	7.5	5.12
30	6.6	6.94				27.5	6,81	6,5	29.8	7.84	6.85	31	7	5.34
31	6.3	7.16				27.6	7,12	6,8	27.8	7.12	6.74	30	6.9	5.95
29.5	5.6	3.98							27.1	7	6.46	30	6.9	6.23
29	5.4	4.02							29.5	7.37	6.51	30	7.4	5.55
30	5.3	4.52							28.5	7.21	6.79	31	7.6	5.34
29	5.4	4.61							29.6	7.24	6.84	30	6.8	5.4
28	5.2	5.32							28.2	8.23	6.62	31	7.3	5
29	4.3	4.21							29.5	7.64	6.84	30.5	6.8	5.42
29	4.5	4.4							29.8	6.98	6.46	29	6.8	5.41
29	4.9	3.95							28.4	6.92	6.49	29	6	5.35
30.2	4.7	4.64							29.1	6.8	6.75	29.5	6.7	5.47
29	5.3	4.67							28.8	6.43	6.82	29.5	7.1	5.12
29	5.7	5.07							28	6.67	6.87	30.2	6.8	5.32
29	4.7	3.78							28.7	6.83	6.7	29.2	7.1	5.33
30	5.8	6.98							27	8.12	7.02	30.5	7.1	4.97
									27.6	6.2	6.93	30	7.4	5.74
									27.5	6.3	7.05	30.5	7.4	6.02
									28.3	6.62	6.99	30.5	6.7	5.41
									28.7	6.69	7	30.5	7	5.27
									29.1	6.65	6,93	30	7.4	6.31
									28.2	6.47	6,82	30	7	5.72
									27	6.72	7,09	30	7.7	5.81
									27.6	6.88	6,71	29	7.3	5.78
									28.8	7.41	6,86	29	6.9	4.96
									27.9	7.4	6,8	30	7.2	5.2
									28.8	7.41	6,88	30	7.2	5.39
									27.1	7.46	6,85	30	7.2	5.19
									27.6	7.84	6,9	31	7.5	4.92
									27.4	7.29	6.44	30	6.9	5.2
												30.5	7.2	5.56
												31	7.2	4.36
												31	7.1	5.41
												31	7.4	5.29
												31	7.2	5.18
												30	6.4	5.54
												30	7.3	4.48
												31	7.6	4.35
												31	7	4.37
												31	7.3	4.28
												31	6.6	5.11
												31	7.4	4.68
												31	7.1	4.1
												30.5	7	4.18
												30	6.9	3.63
												31	6.5	3.01
												31	7.2	3.99
												31	7.1	4.49
												30	7.3	4.27
