# Supplementary material for: Mismatches between the genetic and phenotypic sex in the wild Kou population of Nile tilapia Oreochromis niloticus
Source: PeerJ. 2019 Sep 18;7:e7709. doi: 10.7717/peerj.7709 (PMC6754722; doi:10.7717/peerj.7709)
Supplement: Table S5 — Lake Kpandu is located in Ghana and shares the same Volta basin as Lake Kou, draining into the Volta River. [file peerj-07-7709-s007.xlsx]

## Sheet: Table S5 
				amh9480 - SNP A/C
Wild Population	Individual	Phenotypic sex	Sexual Genotype based on amh markers	Intron6 variant		Method of identification
Kpandu	1	male	-	A	C	Sanger sequencing
Kpandu	2	male	-	A	C
Kpandu	3	male	-	A	C
Kpandu	4	male	-	A	C
Kpandu	5	male	-	A	C
Kpandu	6	male	-	A	A
Kpandu	7	male	-	A	C
Kpandu	8	male	-	A	A
Kpandu	9	male	-	A	C
Kpandu	10	male	-	A	C
Kpandu	11	male	XY	A	C	KASP assay
Kpandu	12	male	XY	A	C
Kpandu	13	male	XY	A	C
Kpandu	14	male	XY	A	C
Kpandu	15	male	XY	A	C
Kpandu	16	male	XY	A	C
Kpandu	17	male	XX	A	A
Kpandu	18	male	XX	A	A
Kpandu	19	male	XX	A	A
Kpandu	20	male	XX	A	A
Kpandu	21	male	XX	A	A
Kpandu	22	male	XX	A	A
Kpandu	23	female	-	A	A	Sanger sequencing
Kpandu	24	female	-	A	A
Kpandu	25	female	-	A	A
Kpandu	26	female	-	A	A
Kpandu	27	female	-	A	A
Kpandu	28	female	-	A	A
Kpandu	29	female	-	A	A
Kpandu	30	female	-	A	A
Kpandu	31	female	-	A	A
Kpandu	32	female	-	A	A
Kpandu	33	female	XX	A	A	KASP assay
Kpandu	34	female	XX	A	A
Kpandu	35	female	XX	A	A
Kpandu	36	female	XX	A	A
Kpandu	37	female	XX	A	A
Kpandu	38	female	XX	A	A
