# Supplementary material for: Mismatches between the genetic and phenotypic sex in the wild Kou population of Nile tilapia Oreochromis niloticus
Source: PeerJ. 2019 Sep 18;7:e7709. doi: 10.7717/peerj.7709 (PMC6754722; doi:10.7717/peerj.7709)
Supplement: Table S6 — Primers’ sequences, localisation of the markers, and the references are indicated. [file peerj-07-7709-s008.xlsx]

## Sheet: Table S6
Marker ID	LG	Gene	Functional consequence	Primer_AlleleFAM	Primer_AlleleHEX	Primer_Common	References
OniAmh9480_LG23	LG23	amh	Intron 6 variant	CAAATGATATAATAATAGAAACGAAGCCTTTTT	AAATGATATAATAATAGAAACGAAGCCTTTTG	GTGTGTGTGAGCTTGGCTGAYGTT	Ndiwa et al., unpublished data
OniAmh7488_LG23	LG23	amhY	Exon 2 missense GAT/GAG	TAGCGAGGTCTAACGAGACCG	GTTAGCGAGGTCTAACGAGACCA	CTCGCAGTCTGCCCGCTCAT	Li et al., 2015
OniAmh8996_LG23	LG23	amh	Exon 6 missense TTG/GAT	AACTGAGTGCGTTACAGGAGAAAG	AACTGAGTGCGTTACAGGAGAAAC	TTGCACATGTCACCTGTGGCATGTT	Wessels et al., 2014
Oni23063_LG1	LG1	elp4	Intron variant	AAAGTGAAATCCCAGCCACA	GCTAAAGTGAAATCCCAGCCACG	TGCTGAACGCRTCCTCAAACATTACAT	Palaiokostas et al., 2013
Oni28137_LG1	LG1	csmd1	Intron variant	ACCAAGACGCCACAGACAGTTG	CACCAAGACGCCACAGACAGTTT	GAGACCGTGGCGTCAGACAGTA	Palaiokostas et al., 2014
