# Supplementary material for: Mismatches between the genetic and phenotypic sex in the wild Kou population of Nile tilapia Oreochromis niloticus
Source: PeerJ. 2019 Sep 18;7:e7709. doi: 10.7717/peerj.7709 (PMC6754722; doi:10.7717/peerj.7709)
Supplement: Table S7 — Sampling details and the mortality due to technical failures are shown. [file peerj-07-7709-s009.xlsx]

## Sheet: Table S7
							Mortality (number)			Sex Ratio
Families	Breeders ID	Initial Number	Sampled individuals (A)	Survivals at 90 dpf (B)	Total Survivals (A+B)	Mortality rate %	Total N	Technical failures▲		N sexed	Sex ratio (N males)
								N	age (dpf)
Ko7	M-3 × F-94	189	50	25	75	60.3175	114	93	85	25	11
Ko3	M-89 × F-57	754	150	47	197	74	557	511	23	47	24
Ko19	m-109 × F-28	209	60	113	173	17.2249	36	13	50	100	52
Ko21	m-109 × F-100	48	0	48	48	0	0	0	-	48	26
Ko31	M-116 × F-36	195	60	113	173	11.2821	22	7	88	100	44
Ko32	M-117 × F-25	240	60	137	197	17.9167	43	15	85	100	51
Ko5	M-34 × F-75	1215	120	589	709	41.6461	506	367	54 & 87	100	45
Ko8	M-80 × f-82	815	120	383	503	38.2822	312	203	47 & 86	100	46
Ko9	M-72 × F-75	945	120	667	787	16.7196	158	99	76	100	52
Ko10	M-72 × F-78	1192	120	794	914	23.3221	278	189	74	100	52
Ko11	M-61 × F-112	577	80	381	461	20.104	116	79	70	109	0
Ko13	M-18 × F-121	321	60	189	249	22.4299	72	54	64	111	53
Ko14	M-84 × F-75	695	120	378	498	28.3453	197	123	39 & 61	99	47
Ko15	M-61 × F-58	410	84	190	274	33.1707	136	107	42 & 63	106	1
Ko18	M-68 × F-25	1053	120	633	753	28.49	300	215	51	108	56
Ko22	M-68 × F-124	714	120	493	613	14.1457	101	64	46	100	50
Ko25	M-37 × F-75	355	75	111	186	47.6056	169	127	32 & 64	100	48
Ko6	M-5 × F-57	59	0	56	56	5.08475	3	0	-	50	0
Ko12	M-5 × F-25	921	120	514	634	31.1618	287	198	45 & 64	100	48
Ko17	M-50 × F-12	395	30	289	319	19.2405	76	54	53	100	61
Ko29	M-50 × F-12	649	30	495	525	19.1063	124	97	27	102	58
Ko24	M-71 × F-12	892	30	738	768	13.9013	124	78	36	102	71
▲ rearing technical problems (power cuts and/or water flow disturbances)
