# Supplementary material for: Mismatches between the genetic and phenotypic sex in the wild Kou population of Nile tilapia Oreochromis niloticus
Source: PeerJ. 2019 Sep 18;7:e7709. doi: 10.7717/peerj.7709 (PMC6754722; doi:10.7717/peerj.7709)
Supplement: Table S8 — Stocking density = Number per aquaria/water volume of aquaria. Mortality frequency = Mortality number/Initial Number. Frequency of fish sexed= Number of sexed fish/Survival number. Males frequency = Number of males. [file peerj-07-7709-s010.xlsx]

## Sheet: Table S8
	Families	Crossings of Male & Female breeders	Breeders ID	Stocking density		Mortality		Fish sexed		Males proportion
				(N/100L)	(N/L)	N	Frequency	N	Frequency	N	Frequency
	Ko3	MXY-amh(X+DY+Y+) × FXX-amh(X+DY-Y-)	M-89 × F-57	251.333	2.51333	557	0.738727	47	0.238579	24	0.510638
	Ko7		M-3 × F-94	189	1.89	114	0.603175	25	0.333333	11	0.44
	Ko19		m-109 × F-28	209	2.09	36	0.172249	100	0.578035	52	0.52
	Ko21		m-109 × F-100	48	0.48	0	0	48	1	26	0.541667
	Ko31		M-116 × F-36	195	1.95	22	0.112821	100	0.578035	44	0.44
	Ko32		M-117 × F-25	240	2.4	43	0.179167	100	0.507614	51	0.51
	Ko5	MXX-amh(X+DY-Y-) ×FXX -amh(X+DY-Y-)	M-34 × F-75	243	2.43	506	0.416461	100	0.141044	45	0.45
	Ko8		M-80 × f-82	203.75	2.0375	312	0.382822	100	0.198807	46	0.46
	Ko9		M-72 × F-75	236.25	2.3625	158	0.167196	100	0.127065	52	0.52
	Ko10		M-72 × F-78	238.4	2.384	278	0.233221	100	0.109409	52	0.52
	Ko11		M-61 × F-112	288.5	2.885	116	0.20104	109	0.236443	0	0
	Ko13		M-18 × F-121	160.5	1.605	72	0.224299	111	0.445783	53	0.477477
	Ko14		M-84 × F-75	231.667	2.31667	197	0.283453	99	0.198795	47	0.474747
	Ko15		M-61 × F-58	205	2.05	136	0.331707	106	0.386861	1	0.01
	Ko18		M-68 × F-25	210.6	2.106	300	0.2849	108	0.143426	56	0.518519
	Ko22		M-68 × F-124	238	2.38	101	0.141457	100	0.163132	50	0.5
	Ko25		M-37 × F-75	177.5	1.775	169	0.476056	100	0.537634	48	0.48
	Ko6	MXY-amh(X+DY-Y+) ×FXX-amh(X+DY-Y-)	M-5 × F-57	59	0.59	3	0.0508475	50	0.892857	0	0
	Ko12		M-5 × F-25	230.25	2.3025	287	0.311618	100	0.157729	48	0.48
	Ko17	MXY-amh(X+DY+Y+) ×FXY amh(X+DY-Y+)	M-50 × F-12	197.5	1.975	76	0.192405	100	0.31348	61	0.61
	Ko29		M-50 × F-12	216.333	2.16333	124	0.191063	102	0.194286	58	0.568
	Ko24		M-71 × F-12	223	2.23	124	0.139013	102	0.132812	71	0.696
