# Supplementary material for: Mismatches between the genetic and phenotypic sex in the wild Kou population of Nile tilapia Oreochromis niloticus
Source: PeerJ. 2019 Sep 18;7:e7709. doi: 10.7717/peerj.7709 (PMC6754722; doi:10.7717/peerj.7709)
Supplement: Table S9 — Raw data for 91 Kou breeders. [file peerj-07-7709-s011.xlsx]

## Sheet: Table S9
N°	gDNA code	Sample ID	Breeder ID	Phenotype	Geno. amhX	Geno. amhDY	Geno. amhY	Pheno/geno amh	S10 (OniAmh9480_LG23)
									483-533 X	523-568 Y	Score	FAM = X = A, HEX = Y = C
1	D919	ONK-8-F-XX	F-8	F	amhX+	amhDY-	amhY-	FXX	4.284	0.833	0.94	Allele X	FAM/FAM	A/A
2	D949	ONK-38-F-XX	F-38	F	amhX+	amhDY-	amhY-	FXX	4.219	0.826	0.94	Allele X	FAM/FAM	A/A
3	D981	ONK-70-F-XX	F-70	F	amhX+	amhDY-	amhY-	FXX	4.201	0.821	0.94	Allele X	FAM/FAM	A/A
4	D935	ONK-24-F-XX	F-24	F	amhX+	amhDY-	amhY-	FXX	4.215	0.846	0.95	Allele X	FAM/FAM	A/A
5	D966	ONK-55-F-XX	F-55	F	amhX+	amhDY-	amhY-	FXX	4.2	0.845	0.95	Allele X	FAM/FAM	A/A
6	D1002	ONK-91-F-XX	F-91	F	amhX+	amhDY-	amhY-	FXX	4.075	0.803	0.94	Allele X	FAM/FAM	A/A
7	D920	ONK-9-F-XX	F-9	F	amhX+	amhDY-	amhY-	FXX	4.439	0.983	1	Allele X	FAM/FAM	A/A
8	D952	ONK-41-F-XX	F-41	F	amhX+	amhDY-	amhY-	FXX	4.132	0.892	0.97	Allele X	FAM/FAM	A/A
9	D984	ONK-73-F-XX	F-73	F	amhX+	amhDY-	amhY-	FXX	4.17	0.906	0.98	Allele X	FAM/FAM	A/A
10	D936	ONK-25-F-XX	F-25	F	amhX+	amhDY-	amhY-	FXX	4.646	0.966	0.98	Allele X	FAM/FAM	A/A
11	D968	ONK-57-F-XX	F-57	F	amhX+	amhDY-	amhY-	FXX	4.394	0.902	0.97	Allele X	FAM/FAM	A/A
12	D1004	ONK-93-F-XX	F-93	F	amhX+	amhDY-	amhY-	FXX	4.482	0.916	0.97	Allele X	FAM/FAM	A/A
13	D926	ONK-15-F-XX	F-15	F	amhX+	amhDY-	amhY-	FXX	4.409	0.939	0.98	Allele X	FAM/FAM	A/A
14	D954	ONK-43-F-XX	F-43	F	amhX+	amhDY-	amhY-	FXX	4.456	0.951	0.98	Allele X	FAM/FAM	A/A
15	D986	ONK-75-F-XX	F-75	F	amhX+	amhDY-	amhY-	FXX	4.366	0.92	0.97	Allele X	FAM/FAM	A/A
16	D938	ONK-27-F-XX	F-27	F	amhX+	amhDY-	amhY-	FXX	4.673	0.945	0.97	Allele X	FAM/FAM	A/A
17	D969	ONK-58-F-XX	F-58	F	amhX+	amhDY-	amhY-	FXX	4.453	0.906	0.96	Allele X	FAM/FAM	A/A
18	D1005	ONK-94-F-XX	F-94	F	amhX+	amhDY-	amhY-	FXX	4.311	0.876	0.96	Allele X	FAM/FAM	A/A
19	D927	ONK-16-F-XX	F-16	F	amhX+	amhDY-	amhY-	FXX	4.258	0.933	0.98	Allele X	FAM/FAM	A/A
20	D955	ONK-44-F-XX	F-44	F	amhX+	amhDY-	amhY-	FXX	4.373	0.963	0.99	Allele X	FAM/FAM	A/A
21	D987	ONK-76-F-XX	F-76	F	amhX+	amhDY-	amhY-	FXX	4.517	0.982	0.99	Allele X	FAM/FAM	A/A
22	D939	ONK-28-F-XX	F-28	F	amhX+	amhDY-	amhY-	FXX	4.169	0.871	0.96	Allele X	FAM/FAM	A/A
23	D971	ONK-60-F-XX	F-60	F	amhX+	amhDY-	amhY-	FXX	4.091	0.857	0.96	Allele X	FAM/FAM	A/A
24	D1007	ONK-96-F-XX	F-96	F	amhX+	amhDY-	amhY-	FXX	4.269	0.984	1	Allele X	FAM/FAM	A/A
25	D930	ONK-19-F-XX	F-19	F	amhX+	amhDY-	amhY-	FXX	4.842	1.006	0.99	Allele X	FAM/FAM	A/A
26	D957	ONK-46-F-XX	F-46	F	amhX+	amhDY-	amhY-	FXX	4.639	0.961	0.98	Allele X	FAM/FAM	A/A
27	D989	ONK-78-F-XX	F-78	F	amhX+	amhDY-	amhY-	FXX	4.663	0.961	0.98	Allele X	FAM/FAM	A/A
28	D941	ONK-30-F-XX	F-30	F	amhX+	amhDY-	amhY-	FXX	4.382	0.958	0.99	Allele X	FAM/FAM	A/A
29	D974	ONK-63-F-XX	F-63	F	amhX+	amhDY-	amhY-	FXX	4.503	0.945	0.98	Allele X	FAM/FAM	A/A
30	D1010	ONK-99-F-XX	F-99	F	amhX+	amhDY-	amhY-	FXX	4.462	0.945	0.98	Allele X	FAM/FAM	A/A
31	D931	ONK-20-F-XX	F-20	F	amhX+	amhDY-	amhY-	FXX	4.607	0.957	0.98	Allele X	FAM/FAM	A/A
32	D958	ONK-47-F-XX	F-47	F	amhX+	amhDY-	amhY-	FXX	4.47	0.95	0.98	Allele X	FAM/FAM	A/A
33	D993	ONK-82-F-XX	F-82	F	amhX+	amhDY-	amhY-	FXX	4.454	0.956	0.98	Allele X	FAM/FAM	A/A
34	D944	ONK-33-F-XX	F-33	F	amhX+	amhDY-	amhY-	FXX	4.607	0.938	0.97	Allele X	FAM/FAM	A/A
35	D976	ONK-65-F-XX	F-65	F	amhX+	amhDY-	amhY-	FXX	4.633	1.007	1	Allele X	FAM/FAM	A/A
36	D932	ONK-21-F-XX	F-21	F	amhX+	amhDY-	amhY-	FXX	4.716	0.93	0.96	Allele X	FAM/FAM	A/A
37	D999	ONK-88-F-XX	F-88	F	amhX+	amhDY-	amhY-	FXX	4.546	0.937	0.97	Allele X	FAM/FAM	A/A
38	D946	ONK-35-F-XX	F-35	F	amhX+	amhDY-	amhY-	FXX	4.713	0.943	0.97	Allele X	FAM/FAM	A/A
39	D977	ONK-66-F-XX	F-66	F	amhX+	amhDY-	amhY-	FXX	4.713	0.977	0.98	Allele X	FAM/FAM	A/A
40	D934	ONK-23-F-XX	F-23	F	amhX+	amhDY-	amhY-	FXX	4.373	0.938	0.98	Allele X	FAM/FAM	A/A
41	D964	ONK-53-F-XX	F-53	F	amhX+	amhDY-	amhY-	FXX	4.416	0.953	0.98	Allele X	FAM/FAM	A/A
42	D1001	ONK-90-F-XX	F-90	F	amhX+	amhDY-	amhY-	FXX	4.577	1.005	1	Allele X	FAM/FAM	A/A
43	D947	ONK-36-F-XX	F-36	F	amhX+	amhDY-	amhY-	FXX	5.056	0.969	0.97	Allele X	FAM/FAM	A/A
44	D980	ONK-69-F-XX	F-69	F	amhX+	amhDY-	amhY-	FXX	4.814	1.229	0.93	Allele X	FAM/FAM	A/A
45	D963	ONK-52-F-XY	F-12	F	amhX+	amhDY-	amhY+	FXY?	4.719	0.95	0.97	Allele X	FAM/FAM	A/A
46	D945	ONK-34-M-XX	M-34	M	amhX+	amhDY-	amhY-	MXX	4.283	0.835	0.94	Allele X	FAM/FAM	A/A
47	D991	ONK-80-M-XX	M-80	M	amhX+	amhDY-	amhY-	MXX	4.229	0.835	0.94	Allele X	FAM/FAM	A/A
48	D948	ONK-37-M-XX	M-37	M	amhX+	amhDY-	amhY-	MXX	4.177	0.894	0.97	Allele X	FAM/FAM	A/A
49	D992	ONK-81-M-XX	M-81	M	amhX+	amhDY-	amhY-	MXX	4.344	0.904	0.97	Allele X	FAM/FAM	A/A
50	D956	ONK-45-M-XX	M-45	M	amhX+	amhDY-	amhY-	MXX	4.465	0.977	0.99	Allele X	FAM/FAM	A/A
51	D995	ONK-84-M-XX	M-84	M	amhX+	amhDY-	amhY-	MXX	4.72	0.964	0.98	Allele X	FAM/FAM	A/A
52	D959	ONK-48-M-XX	M-48	M	amhX+	amhDY-	amhY-	MXX	4.562	1.02	1	Allele X	FAM/FAM	A/A
53	D998	ONK-87-M-XX	M-87	M	amhX+	amhDY-	amhY-	MXX	4.363	0.966	0.99	Allele X	FAM/FAM	A/A
54	D967	ONK-56-M-XX	M-56	M	amhX+	amhDY-	amhY-	MXX	4.337	0.942	0.98	Allele X	FAM/FAM	A/A
55	D972	ONK-61-M-XX	M-61	M	amhX+	amhDY-	amhY-	MXX	4.208	0.937	0.99	Allele X	FAM/FAM	A/A
56	D916	ONK-5-M-XX	M-5	M	amhX+	amhDY-	amhY+	MXX	4.375	0.949	0.99	Allele X	FAM/FAM	A/A
57	D979	ONK-68-M-XX	M-68	M	amhX+	amhDY-	amhY-	MXX	4.495	0.93	0.97	Allele X	FAM/FAM	A/A
58	D929	ONK-18-M-XX	M-18	M	amhX+	amhDY-	amhY-	MXX	4.586	0.945	0.97	Allele X	FAM/FAM	A/A
59	D983	ONK-72-M-XX	M-72	M	amhX+	amhDY-	amhY-	MXX	4.468	1.005	1	Allele X	FAM/FAM	A/A
60	D933	ONK-22-M-XX	M-22	M	amhX+	amhDY-	amhY-	MXX	4.73	1.136	0.96	Allele X	FAM/FAM	A/A
61	D924	ONK-13-M-XY	M-13	M	amhX+	amhDY+	amhY+	MXY	2.637	2.343	0.88	Both Alleles	FAM/HEX	A/C
62	D978	ONK-67-M-XY	M-67	M	amhX+	amhDY+	amhY+	MXY	2.567	2.292	0.89	Both Alleles	FAM/HEX	A/C
63	D951	ONK-40-M-XY	M-40	M	amhX+	amhDY+	amhY+	MXY	2.66	2.416	0.91	Both Alleles	FAM/HEX	A/C
64	D1003	ONK-92-M-XY	M-92	M	amhX+	amhDY+	amhY+	MXY	2.869	2.555	0.89	Both Alleles	FAM/HEX	A/C
65	D925	ONK-14-M-XY	M-14	M	amhX+	amhDY+	amhY+	MXY	2.649	2.474	0.94	Both Alleles	FAM/HEX	A/C
66	D982	ONK-71-M-XY	M-71	M	amhX+	amhDY+	amhY+	MXY	2.878	2.701	0.95	Both Alleles	FAM/HEX	A/C
67	D953	ONK-42-M-XY	M-42	M	amhX+	amhDY+	amhY+	MXY	2.644	2.517	0.96	Both Alleles	FAM/HEX	A/C
68	D1006	ONK-95-M-XY	M-95	M	amhX+	amhDY+	amhY+	MXY	2.734	2.724	0.99	Both Alleles	FAM/HEX	A/C
69	D928	ONK-17-M-XY	M-17	M	amhX+	amhDY+	amhY+	MXY	2.721	2.686	1	Both Alleles	FAM/HEX	A/C
70	D985	ONK-74-M-XY	M-74	M	amhX+	amhDY+	amhY+	MXY	2.704	3.262	0.83	Both Alleles	FAM/HEX	A/C
71	D960	ONK-49-M-XY	M-49	M	amhX+	amhDY+	amhY+	MXY	2.869	2.765	0.98	Both Alleles	FAM/HEX	A/C
72	D1009	ONK-98-M-XY	M-98	M	amhX+	amhDY+	amhY+	MXY	2.747	3.435	0.8	Both Alleles	FAM/HEX	A/C
73	D937	ONK-26-M-XY	M-26	M	amhX+	amhDY+	amhY+	MXY	2.863	2.749	0.97	Both Alleles	FAM/HEX	A/C
74	D988	ONK-77-M-XY	M-77	M	amhX+	amhDY+	amhY+	MXY	2.775	2.846	0.96	Both Alleles	FAM/HEX	A/C
75	D961	ONK-50-M-XY	M-50	M	amhX+	amhDY+	amhY+	MXY	2.808	2.649	0.95	Both Alleles	FAM/HEX	A/C
76	D940	ONK-29-M-XY	M-29	M	amhX+	amhDY+	amhY+	MXY	3.036	2.806	0.93	Both Alleles	FAM/HEX	A/C
77	D994	ONK-83-M-XY	M-83	M	amhX+	amhDY+	amhY+	MXY	3.013	2.754	0.92	Both Alleles	FAM/HEX	A/C
78	D912	ONK-1-M-XY	M-1	M	amhX+	amhDY+	amhY+	MXY	2.752	2.612	0.96	Both Alleles	FAM/HEX	A/C
79	D962	ONK-51-M-XY	M-51	M	amhX+	amhDY+	amhY+	MXY	3.17	3.042	0.97	Both Alleles	FAM/HEX	A/C
80	D942	ONK-31-M-XY	M-31	M	amhX+	amhDY+	amhY+	MXY	2.862	2.672	0.94	Both Alleles	FAM/HEX	A/C
81	D996	ONK-85-M-XY	M-85	M	amhX+	amhDY+	amhY+	MXY	2.974	2.842	0.97	Both Alleles	FAM/HEX	A/C
82	D913	ONK-2-M-XY	M-2	M	amhX+	amhDY+	amhY+	MXY	2.689	2.527	0.95	Both Alleles	FAM/HEX	A/C
83	D965	ONK-54-M-XY	M-54	M	amhX+	amhDY+	amhY+	MXY	2.886	2.753	0.97	Both Alleles	FAM/HEX	A/C
84	D943	ONK-32-M-XY	M-32	M	amhX+	amhDY+	amhY+	MXY	2.946	2.729	0.93	Both Alleles	FAM/HEX	A/C
85	D997	ONK-86-M-XY	M-86	M	amhX+	amhDY+	amhY+	MXY	3.111	2.876	0.93	Both Alleles	FAM/HEX	A/C
86	D914	ONK-3-M-XY	M-3	M	amhX+	amhDY+	amhY+	MXY	2.987	2.715	0.91	Both Alleles	FAM/HEX	A/C
87	D970	ONK-59-M-XY	M-59	M	amhX+	amhDY+	amhY+	MXY	3.097	2.83	0.92	Both Alleles	FAM/HEX	A/C
88	D950	ONK-39-M-XY	M-39	M	amhX+	amhDY+	amhY+	MXY	2.877	2.647	0.93	Both Alleles	FAM/HEX	A/C
89	D1000	ONK-89-M-XY	M-89	M	amhX+	amhDY+	amhY+	MXY	2.855	2.771	0.98	Both Alleles	FAM/HEX	A/C
90	D915	ONK-4-M-XY	M-4	M	amhX+	amhDY+	amhY+	MXY	3.025	2.804	0.93	Both Alleles	FAM/HEX	A/C
91	D973	ONK-62-M-XY	M-62	M	amhX+	amhDY+	amhY+	MXY	2.967	2.796	0.95	Both Alleles	FAM/HEX	A/C
