# Supplementary material for: Mismatches between the genetic and phenotypic sex in the wild Kou population of Nile tilapia Oreochromis niloticus
Source: PeerJ. 2019 Sep 18;7:e7709. doi: 10.7717/peerj.7709 (PMC6754722; doi:10.7717/peerj.7709)
Supplement: Table S10 — The repeated crossings with the same Kou parents demonstrate that mortalities are not sex-biased. [file peerj-07-7709-s012.xlsx]

## Sheet: Table S10
											Fisher exact test		Fisher exact test
Families	Crossings of Male & Female breeders			Breeders ID			Survival rate	Mortality rate	N sexed	% Males	Vs 1:1		(a) Vs (b)
											P	Sig.	P	Sig.
Lu8-a	m amh(X+DY-Y-)	×	f amh(X+DY-Y-)	Ko20-m1	×	Ko17-f1	74.3243	25.6757	55	20	0.0008533	***	>0.9999999	NS
Lu8-b				Ko20-m1	×	Ko17-f1	95.2941	4.70588	81	19.7531	4.378e-05	***
Lu16-a	m amh(X+DY+Y+)	×	f amh(X+DY-Y-)	Ko19-m1	×	Ko16-f1	83.6957	16.3043	77	53.2468	0.809	NS	0.7822	NS
Lu16-b				Ko19-m1	×	Ko16-f1	95.8824	4.11765	100	50	>0.9999999	NS
Ko7-a	M amh(X+DY+Y+)	×	F amh(X+DY-Y-)	M-3	×	F-94	40	60	25	44	0.6713	NS	0.1571	NS
Ko7-b				M-4	×	F-95	11.7647	88.2353	20	55	0.5712	NS
