# Supplementary material for: Mismatches between the genetic and phenotypic sex in the wild Kou population of Nile tilapia Oreochromis niloticus
Source: PeerJ. 2019 Sep 18;7:e7709. doi: 10.7717/peerj.7709 (PMC6754722; doi:10.7717/peerj.7709)
Supplement: Table S11 — Raw data. The dead fish due to technical problem (hypoxia) were sexed immediately upon death. Then 50 fish were sampled among survivors, sacrificed and sexed. After sampling, the survivors were also sacrificed and sexed. Sex-ratio are compared using Fischer exact test. The detailed table of sexing, the summary table of sexing, the statistical analysis and the variation of dissolved oxygen in the aquaria during the technical problem, are shown. [file peerj-07-7709-s013.xlsx]

## Sheet: Table S11
N°	Progenies	Type	Time	Rank	Sexe	Weight		N°	Progenies	Type	Time	Rank	Sexe	Weight				Sex-ratio (N)		Sex-ratio (%)			Time	Fam.1	Fam.2
1	Fam.1	Hypoxia	T3	1	F	37.922		1	Fam.2	Hypoxia	T4	1	M	32.557				M	F	M	F		T0	5.77	5.91
2	Fam.1	Hypoxia		2	M	39.402		2	Fam.2	Hypoxia		2	F	41.241		Fam.1	Hypoxia	21	12	63.6364	36.3636		T1	4.42	4.08
3	Fam.1	Hypoxia	T4	3	M	28.047		3	Fam.2	Hypoxia		3	M	36.422			Sampling	29	21	58	42		T2	3.32	3.02
4	Fam.1	Hypoxia		4	M	28.578		4	Fam.2	Hypoxia	T5	4	M	40.602			Survivor	18	18	50	50		T3	2.51	2.05
5	Fam.1	Hypoxia	T5	5	F	33.013		5	Fam.2	Hypoxia		5	M	38.713			Hypoxia+ Sampling	50	33	60.241	39.759		T4	1.68	1.53
6	Fam.1	Hypoxia	T6	6	M	40.425		6	Fam.2	Hypoxia		6	M	36.521			Sampling + Hypoxia + Survivors	68	51	57.1429	42.8571		T5	1.76	1.48
7	Fam.1	Hypoxia		7	M	42.994		7	Fam.2	Hypoxia		7	M	26.342		Fam.2	Hypoxia	25	7	78.125	21.875		T6	1.54	1.34
8	Fam.1	Hypoxia	T7	8	M	38.683		8	Fam.2	Hypoxia		8	M	32.325			Sampling	31	19	62	38		T7	1.38	1.14
9	Fam.1	Hypoxia		9	F	36.101		9	Fam.2	Hypoxia		9	M	26.79			Survivor	21	13	61.7647	38.2353		T8	1.17	1.06
10	Fam.1	Hypoxia		10	F	34.736		10	Fam.2	Hypoxia	T6	10	M	26.748			Hypoxia+ Sampling	56	26	68.2927	31.7073		T9	1.04	0.99
11	Fam.1	Hypoxia		11	M	37.859		11	Fam.2	Hypoxia	T7	11	F	26.208			Sampling + Hypoxia + Survivors	77	39	66.3793	33.6207
12	Fam.1	Hypoxia	T8	12	F	31.295		12	Fam.2	Hypoxia	T8	12	M	37.872
13	Fam.1	Hypoxia		13	M	38.38		13	Fam.2	Hypoxia		13	F	38.256
14	Fam.1	Hypoxia		14	F	31.71		14	Fam.2	Hypoxia		14	M	35.951
15	Fam.1	Hypoxia		15	M	27.253		15	Fam.2	Hypoxia		15	M	29.29		Fisher exact test
16	Fam.1	Hypoxia		16	M	31.191		16	Fam.2	Hypoxia		16	M	27.37				Hypoxia
17	Fam.1	Hypoxia		17	F	38.635		17	Fam.2	Hypoxia		17	M	31.403		Fam.2	Hypoxia		Sampling
18	Fam.1	Hypoxia		18	M	31.866		18	Fam.2	Hypoxia		18	M	30.98			Sampling	0.7788NS		Survivor
19	Fam.1	Hypoxia		19	M	36.634		19	Fam.2	Hypoxia		19	M	27.791			Survivor	0.3693NS	0.6058NS		Hypoxia + Sampling
20	Fam.1	Hypoxia		20	F	30.336		20	Fam.2	Hypoxia		20	M	29.63			Hypoxia+ Sampling	0.9042NS	0.9399NS	0.4031NS
21	Fam.1	Hypoxia		21	M	30.483		21	Fam.2	Hypoxia		21	M	23.941			Sampling + Hypoxia + Survivors	0.6423NS	>0.9999NS	0.5712NS	0.7695NS
22	Fam.1	Hypoxia		22	M	35.527		22	Fam.2	Hypoxia		22	F	27.738
23	Fam.1	Hypoxia		23	M	36.057		23	Fam.2	Hypoxia		23	M	29.02				Hypoxia
24	Fam.1	Hypoxia		24	M	32.225		24	Fam.2	Hypoxia		24	M	35.738		Fam.2	Hypoxia		Sampling
25	Fam.1	Hypoxia		25	M	30.683		25	Fam.2	Hypoxia		25	F	40.294			Sampling	0.1959NS		Survivor
26	Fam.1	Hypoxia		26	F	32.031		26	Fam.2	Hypoxia		26	F	36.79			Survivor	0.2386NS	>0.9999NS		Hypoxia + Sampling
27	Fam.1	Hypoxia		27	F	36.585		27	Fam.2	Hypoxia		27	M	46.835			Hypoxia+ Sampling	0.4211NS	0.5798NS	0.6392NS
28	Fam.1	Hypoxia		28	F	31.371		28	Fam.2	Hypoxia		28	M	31.337			Sampling + Hypoxia + Survivors	0.2904NS	0.7104NS	0.7623NS	0.9000NS
29	Fam.1	Hypoxia	T9	29	M	40.945		29	Fam.2	Hypoxia	T9	29	M	39.195
30	Fam.1	Hypoxia		30	M	52.38		30	Fam.2	Hypoxia		30	M	28.26
31	Fam.1	Hypoxia		31	M	38.234		31	Fam.2	Hypoxia		31	M	33.171
32	Fam.1	Hypoxia		32	M	34.565		32	Fam.3	Hypoxia		32	F	25.836
33	Fam.1	Hypoxia		33	F	27.431		33	Fam.2	Sampling	-	-	M	38.255
34	Fam.1	Sampling	-	-	M	37.06		34	Fam.2	Sampling	-	-	M	31.162
35	Fam.1	Sampling	-	-	M	41.461		35	Fam.2	Sampling	-	-	M	29.549
36	Fam.1	Sampling	-	-	F	37.549		36	Fam.2	Sampling	-	-	F	39.995
37	Fam.1	Sampling	-	-	M	32.043		37	Fam.2	Sampling	-	-	M	38.098
38	Fam.1	Sampling	-	-	M	38.103		38	Fam.2	Sampling	-	-	F	34.672
39	Fam.1	Sampling	-	-	F	32.491		39	Fam.2	Sampling	-	-	M	45.997
40	Fam.1	Sampling	-	-	M	37.038		40	Fam.2	Sampling	-	-	F	29.919
41	Fam.1	Sampling	-	-	F	26.938		41	Fam.2	Sampling	-	-	F	24.863
42	Fam.1	Sampling	-	-	M	27.937		42	Fam.2	Sampling	-	-	F	26.824
43	Fam.1	Sampling	-	-	F	27.259		43	Fam.2	Sampling	-	-	M	33.363
44	Fam.1	Sampling	-	-	M	25.567		44	Fam.2	Sampling	-	-	M	25.872
45	Fam.1	Sampling	-	-	M	25.545		45	Fam.2	Sampling	-	-	M	32.503
46	Fam.1	Sampling	-	-	F	28.887		46	Fam.2	Sampling	-	-	M	37.005
47	Fam.1	Sampling	-	-	M	29.011		47	Fam.2	Sampling	-	-	M	35.699
48	Fam.1	Sampling	-	-	F	33.542		48	Fam.2	Sampling	-	-	M	31.176
49	Fam.1	Sampling	-	-	F	23.08		49	Fam.2	Sampling	-	-	F	28.03
50	Fam.1	Sampling	-	-	M	30.518		50	Fam.2	Sampling	-	-	M	40.148
51	Fam.1	Sampling	-	-	M	40.73		51	Fam.2	Sampling	-	-	M	30.493
52	Fam.1	Sampling	-	-	F	31.873		52	Fam.2	Sampling	-	-	F	26.899
53	Fam.1	Sampling	-	-	F	28.87		53	Fam.2	Sampling	-	-	M	33.556
54	Fam.1	Sampling	-	-	F	33.018		54	Fam.2	Sampling	-	-	F	35.276
55	Fam.1	Sampling	-	-	M	39.891		55	Fam.2	Sampling	-	-	M	28.051
56	Fam.1	Sampling	-	-	M	34.123		56	Fam.2	Sampling	-	-	F	31.67
57	Fam.1	Sampling	-	-	M	32.423		57	Fam.2	Sampling	-	-	M	24.417
58	Fam.1	Sampling	-	-	F	33.481		58	Fam.2	Sampling	-	-	M	37.389
59	Fam.1	Sampling	-	-	M	39.631		59	Fam.2	Sampling	-	-	F	39.967
60	Fam.1	Sampling	-	-	F	40.702		60	Fam.2	Sampling	-	-	M	25.61
61	Fam.1	Sampling	-	-	M	29.727		61	Fam.2	Sampling	-	-	F	32.573
62	Fam.1	Sampling	-	-	M	30.355		62	Fam.2	Sampling	-	-	M	25.179
63	Fam.1	Sampling	-	-	M	26.141		63	Fam.2	Sampling	-	-	M	34.449
64	Fam.1	Sampling	-	-	F	32.535		64	Fam.2	Sampling	-	-	F	30.632
65	Fam.1	Sampling	-	-	M	40.736		65	Fam.2	Sampling	-	-	M	33.295
66	Fam.1	Sampling	-	-	M	41.364		66	Fam.2	Sampling	-	-	F	31.05
67	Fam.1	Sampling	-	-	M	30.107		67	Fam.2	Sampling	-	-	M	28.365
68	Fam.1	Sampling	-	-	F	28.963		68	Fam.2	Sampling	-	-	F	33.997
69	Fam.1	Sampling	-	-	M	26.957		69	Fam.2	Sampling	-	-	M	35.443
70	Fam.1	Sampling	-	-	M	33.418		70	Fam.2	Sampling	-	-	M	28.203
71	Fam.1	Sampling	-	-	M	32.947		71	Fam.2	Sampling	-	-	F	24.641
72	Fam.1	Sampling	-	-	M	23.432		72	Fam.2	Sampling	-	-	M	31.821
73	Fam.1	Sampling	-	-	M	24.117		73	Fam.2	Sampling	-	-	F	44.06
74	Fam.1	Sampling	-	-	F	26.937		74	Fam.2	Sampling	-	-	F	34.175
75	Fam.1	Sampling	-	-	F	34.431		75	Fam.2	Sampling	-	-	F	33.654
76	Fam.1	Sampling	-	-	F	30.684		76	Fam.2	Sampling	-	-	M	32.32
77	Fam.1	Sampling	-	-	F	25.79		77	Fam.2	Sampling	-	-	M	29.54
78	Fam.1	Sampling	-	-	M	27.165		78	Fam.2	Sampling	-	-	M	29.814
79	Fam.1	Sampling	-	-	M	39.253		79	Fam.2	Sampling	-	-	M	27.784
80	Fam.1	Sampling	-	-	M	31.14		80	Fam.2	Sampling	-	-	M	32.519
81	Fam.1	Sampling	-	-	F	31.695		81	Fam.2	Sampling	-	-	M	27.329
82	Fam.1	Sampling	-	-	F	21.617		82	Fam.2	Sampling	-	-	F	23.786
83	Fam.1	Sampling	-	-	F	31.445		83	Fam.2	Suvivor	-	-	M	33.089
84	Fam.1	Survivor	-	-	M	36.602		84	Fam.2	Suvivor	-	-	M	30.556
85	Fam.1	Survivor	-	-	M	38.37		85	Fam.2	Suvivor	-	-	F	37.772
86	Fam.1	Survivor	-	-	M	37.904		86	Fam.2	Suvivor	-	-	M	26.113
87	Fam.1	Survivor	-	-	F	27.727		87	Fam.2	Suvivor	-	-	F	27.594
88	Fam.1	Survivor	-	-	M	25.587		88	Fam.2	Suvivor	-	-	F	32.121
89	Fam.1	Survivor	-	-	M	29.677		89	Fam.2	Suvivor	-	-	F	29.861
90	Fam.1	Survivor	-	-	M	24.936		90	Fam.2	Suvivor	-	-	M	33.22
91	Fam.1	Survivor	-	-	F	32.498		91	Fam.2	Suvivor	-	-	F	37.262
92	Fam.1	Survivor	-	-	M	37.388		92	Fam.2	Suvivor	-	-	M	26.305
93	Fam.1	Survivor	-	-	M	40.505		93	Fam.2	Suvivor	-	-	F	41.375
94	Fam.1	Survivor	-	-	M	28.123		94	Fam.2	Suvivor	-	-	M	30.869
95	Fam.1	Survivor	-	-	F	31.968		95	Fam.2	Suvivor	-	-	F	34.443
96	Fam.1	Survivor	-	-	F	37.574		96	Fam.2	Suvivor	-	-	F	34.067
97	Fam.1	Survivor	-	-	M	29.715		97	Fam.2	Suvivor	-	-	F	38.302
98	Fam.1	Survivor	-	-	F	35.085		98	Fam.2	Suvivor	-	-	M	42.908
99	Fam.1	Survivor	-	-	F	31.066		99	Fam.2	Suvivor	-	-	M	46.259
100	Fam.1	Survivor	-	-	F	31.552		100	Fam.2	Suvivor	-	-	M	46.127
101	Fam.1	Survivor	-	-	M	43.099		101	Fam.2	Suvivor	-	-	M	47.188
102	Fam.1	Survivor	-	-	F	35.17		102	Fam.2	Suvivor	-	-	M	36.515
103	Fam.1	Survivor	-	-	F	34.586		103	Fam.2	Suvivor	-	-	M	35.674
104	Fam.1	Survivor	-	-	M	33.732		104	Fam.2	Suvivor	-	-	M	36.256
105	Fam.1	Survivor	-	-	M	34.149		105	Fam.2	Suvivor	-	-	F	35.583
106	Fam.1	Survivor	-	-	M	35.491		106	Fam.2	Suvivor	-	-	F	33.245
107	Fam.1	Survivor	-	-	F	27.33		107	Fam.2	Suvivor	-	-	M	38.587
108	Fam.1	Survivor	-	-	F	31.662		108	Fam.2	Suvivor	-	-	M	34.27
109	Fam.1	Survivor	-	-	F	31.423		109	Fam.2	Suvivor	-	-	M	38.588
110	Fam.1	Survivor	-	-	F	28.374		110	Fam.2	Suvivor	-	-	M	31.752
111	Fam.1	Survivor	-	-	M	39.974		111	Fam.2	Suvivor	-	-	M	28.969
112	Fam.1	Survivor	-	-	M	42.91		112	Fam.2	Suvivor	-	-	M	26.732
113	Fam.1	Survivor	-	-	F	34.855		113	Fam.2	Suvivor	-	-	M	40.216
114	Fam.1	Survivor	-	-	F	46.904		114	Fam.2	Suvivor	-	-	F	33.446
115	Fam.1	Survivor	-	-	M	37.874		115	Fam.2	Suvivor	-	-	M	41.814
116	Fam.1	Survivor	-	-	F	44.006		116	Fam.2	Suvivor	-	-	F	29.638
117	Fam.1	Survivor	-	-	F	46.297
118	Fam.1	Survivor	-	-	M	38.021
119	Fam.1	Survivor	-	-	F	38.878
