# Supplementary material for: Mismatches between the genetic and phenotypic sex in the wild Kou population of Nile tilapia Oreochromis niloticus
Source: PeerJ. 2019 Sep 18;7:e7709. doi: 10.7717/peerj.7709 (PMC6754722; doi:10.7717/peerj.7709)
Supplement: Table S12 — Raw data. The presence or the absence of amhX, amhΔY and amhY are indicated. [file peerj-07-7709-s014.xlsx]

## Sheet: Table S12
N°	Family Code	Sample ID	Phenotype	gDNA code	Geno. amhX	Geno. amhDY	Geno. amhY
1	Ko19	T19-18	F	Ag1544	amhX+	amhDY+	amhY+
2	Ko19	T19-2	F	Ag1528	amhX+	amhDY-	amhY-
3	Ko19	T19-21	F	Ag1547	amhX+	amhDY-	amhY-
4	Ko19	T19-3	F	Ag1529	amhX+	amhDY-	amhY-
5	Ko19	T19-22	F	Ag1548	amhX+	amhDY-	amhY-
6	Ko19	T19-7	F	Ag1533	amhX+	amhDY-	amhY-
7	Ko19	T19-25	F	Ag1551	amhX+	amhDY-	amhY-
8	Ko19	T19-10	F	Ag1536	amhX+	amhDY-	amhY-
9	Ko19	T19-30	F	Ag1556	amhX+	amhDY-	amhY-
10	Ko19	T19-11	F	Ag1537	amhX+	amhDY-	amhY-
11	Ko19	T19-31	F	Ag1557	amhX+	amhDY-	amhY-
12	Ko19	T19-13	F	Ag1539	amhX+	amhDY-	amhY-
13	Ko19	T19-32	F	Ag1558	amhX+	amhDY-	amhY-
14	Ko19	T19-16	F	Ag1542	amhX+	amhDY-	amhY-
15	Ko19	T19-35	F	Ag1561	amhX+	amhDY-	amhY-
16	Ko19	T19-37	F	Ag1563	amhX+	amhDY-	amhY-
17	Ko19	T19-38	F	Ag1564	amhX+	amhDY-	amhY-
18	Ko19	T19-53	F	Ag1579	amhX+	amhDY-	amhY-
19	Ko19	T19-42	F	Ag1568	amhX+	amhDY-	amhY-
20	Ko19	T19-54	F	Ag1580	amhX+	amhDY-	amhY-
21	Ko19	T19-43	F	Ag1569	amhX+	amhDY-	amhY-
22	Ko19	T19-55	F	Ag1581	amhX+	amhDY-	amhY-
23	Ko19	T19-44	F	Ag1570	amhX+	amhDY-	amhY-
24	Ko19	T19-57	F	Ag1583	amhX+	amhDY-	amhY-
25	Ko19	T19-46	F	Ag1572	amhX+	amhDY-	amhY-
26	Ko19	T19-58	F	Ag1584	amhX+	amhDY-	amhY-
27	Ko19	T19-47	F	Ag1573	amhX+	amhDY-	amhY-
28	Ko19	T19-59	F	Ag1585	amhX+	amhDY-	amhY-
29	Ko19	T19-48	F	Ag1574	amhX+	amhDY-	amhY-
30	Ko19	T19-49	F	Ag1575	amhX+	amhDY-	amhY-
31	Ko19	T19-5	M	Ag1527	amhX+	amhDY+	amhY+
32	Ko19	T19-6	M	Ag1541	amhX+	amhDY+	amhY+
33	Ko19	T19-8	M	Ag1530	amhX+	amhDY+	amhY+
34	Ko19	T19-9	M	Ag1543	amhX+	amhDY+	amhY+
35	Ko19	T19-12	M	Ag1531	amhX+	amhDY+	amhY+
36	Ko19	T19-14	M	Ag1545	amhX+	amhDY+	amhY+
37	Ko19	T19-15	M	Ag1532	amhX+	amhDY+	amhY+
38	Ko19	T19-17	M	Ag1546	amhX+	amhDY+	amhY+
39	Ko19	T19-19	M	Ag1534	amhX+	amhDY+	amhY+
40	Ko19	T19-20	M	Ag1549	amhX+	amhDY+	amhY+
41	Ko19	T19-23	M	Ag1535	amhX+	amhDY+	amhY+
42	Ko19	T19-24	M	Ag1550	amhX+	amhDY+	amhY+
43	Ko19	T19-26	M	Ag1538	amhX+	amhDY+	amhY+
44	Ko19	T19-27	M	Ag1552	amhX+	amhDY+	amhY+
45	Ko19	T19-28	M	Ag1540	amhX+	amhDY+	amhY+
46	Ko19	T19-29	M	Ag1553	amhX+	amhDY+	amhY+
47	Ko19	T19-33	M	Ag1554	amhX+	amhDY+	amhY+
48	Ko19	T19-34	M	Ag1571	amhX+	amhDY+	amhY+
49	Ko19	T19-36	M	Ag1555	amhX+	amhDY+	amhY+
50	Ko19	T19-39	M	Ag1576	amhX+	amhDY+	amhY+
51	Ko19	T19-40	M	Ag1559	amhX+	amhDY+	amhY+
52	Ko19	T19-41	M	Ag1577	amhX+	amhDY+	amhY+
53	Ko19	T19-45	M	Ag1560	amhX+	amhDY+	amhY+
54	Ko19	T19-50	M	Ag1578	amhX+	amhDY+	amhY+
55	Ko19	T19-51	M	Ag1562	amhX+	amhDY+	amhY+
56	Ko19	T19-52	M	Ag1582	amhX+	amhDY+	amhY+
57	Ko19	T19-56	M	Ag1565	amhX+	amhDY+	amhY+
58	Ko19	T19-60	M	Ag1586	amhX+	amhDY+	amhY+
59	Ko19	T19-62	M	Ag1566	amhX+	amhDY+	amhY+
60	Ko19	T19-64	M	Ag1567	amhX+	amhDY+	amhY+
1	Ko15	D15-th27-1	F	D2548	amhX+	amhDY-	amhY-
2	Ko15	D15-th27-2	F	D2549	amhX+	amhDY-	amhY-
3	Ko15	D15-th27-3	F	D2550	amhX+	amhDY-	amhY-
4	Ko15	D15-th27-4	F	D2551	amhX+	amhDY-	amhY-
5	Ko15	D15-th27-6	F	D2553	amhX+	amhDY-	amhY-
6	Ko15	D15-th27-7	F	D2554	amhX+	amhDY-	amhY-
7	Ko15	D15-th27-8	F	D2555	amhX+	amhDY-	amhY-
8	Ko15	D15-th27-9	F	D2556	amhX+	amhDY-	amhY-
9	Ko15	D15-th27-10	F	D2557	amhX+	amhDY-	amhY-
10	Ko15	D15-th27-11	F	D2558	amhX+	amhDY-	amhY-
11	Ko15	D15-th27-12	F	D2559	amhX+	amhDY-	amhY-
12	Ko15	D15-th27-13	F	D2560	amhX+	amhDY-	amhY-
13	Ko15	D15-th27-14	F	D2561	amhX+	amhDY-	amhY-
14	Ko15	D15-th27-15	F	D2562	amhX+	amhDY-	amhY-
15	Ko15	D15-th27-16	F	D2563	amhX+	amhDY-	amhY-
16	Ko15	D15-th27-17	F	D2564	amhX+	amhDY-	amhY-
17	Ko15	D15-th27-18	F	D2565	amhX+	amhDY-	amhY-
18	Ko15	D15-th27-19	F	D2566	amhX+	amhDY-	amhY-
19	Ko15	D15-th27-20	F	D2567	amhX+	amhDY-	amhY-
20	Ko15	D15-th27-21	F	D2568	amhX+	amhDY-	amhY-
21	Ko15	D15-th27-22	F	D2569	amhX+	amhDY-	amhY-
22	Ko15	D15-th27-23	F	D2570	amhX+	amhDY-	amhY-
23	Ko15	D15-th27-24	F	D2571	amhX+	amhDY-	amhY-
24	Ko15	D15-th27-25	F	D2572	amhX+	amhDY-	amhY-
25	Ko15	D15-th27-26	F	D2573	amhX+	amhDY-	amhY-
26	Ko15	D15-th27-27	F	D2574	amhX+	amhDY-	amhY-
27	Ko15	D15-th27-29	F	D2576	amhX+	amhDY-	amhY-
28	Ko15	D15-th27-30	F	D2577	amhX+	amhDY-	amhY-
1	Ko22	T22-3	F	Ag1373	amhX+	amhDY-	amhY-
2	Ko22	T22-24	F	Ag1394	amhX+	amhDY-	amhY-
3	Ko22	T22-4	F	Ag1374	amhX+	amhDY-	amhY-
4	Ko22	T22-25	F	Ag1395	amhX+	amhDY-	amhY-
5	Ko22	T22-5	F	Ag1375	amhX+	amhDY-	amhY-
6	Ko22	T22-27	F	Ag1397	amhX+	amhDY-	amhY-
7	Ko22	T22-6	F	Ag1376	amhX+	amhDY-	amhY-
8	Ko22	T22-33	F	Ag1403	amhX+	amhDY-	amhY-
9	Ko22	T22-9	F	Ag1379	amhX+	amhDY-	amhY-
10	Ko22	T22-34	F	Ag1404	amhX+	amhDY-	amhY-
11	Ko22	T22-10	F	Ag1380	amhX+	amhDY-	amhY-
12	Ko22	T22-35	F	Ag1405	amhX+	amhDY-	amhY-
13	Ko22	T22-12	F	Ag1382	amhX+	amhDY-	amhY-
14	Ko22	T22-36	F	Ag1406	amhX+	amhDY-	amhY-
15	Ko22	T22-16	F	Ag1386	amhX+	amhDY-	amhY-
16	Ko22	T22-37	F	Ag1407	amhX+	amhDY-	amhY-
17	Ko22	T22-40	F	Ag1410	amhX+	amhDY-	amhY-
18	Ko22	T22-49	F	Ag1419	amhX+	amhDY-	amhY-
19	Ko22	T22-41	F	Ag1411	amhX+	amhDY-	amhY-
20	Ko22	T22-50	F	Ag1420	amhX+	amhDY-	amhY-
21	Ko22	T22-42	F	Ag1412	amhX+	amhDY-	amhY-
22	Ko22	T22-56	F	Ag1426	amhX+	amhDY-	amhY-
23	Ko22	T22-43	F	Ag1413	amhX+	amhDY-	amhY-
24	Ko22	T22-58	F	Ag1428	amhX+	amhDY-	amhY-
25	Ko22	T22-44	F	Ag1414	amhX+	amhDY-	amhY-
26	Ko22	T22-59	F	Ag1429	amhX+	amhDY-	amhY-
27	Ko22	T22-46	F	Ag1416	amhX+	amhDY-	amhY-
28	Ko22	T22-61	F	Ag1431	amhX+	amhDY-	amhY-
29	Ko22	T22-47	F	Ag1417	amhX+	amhDY-	amhY-
30	Ko22	T22-48	F	Ag1418	amhX+	amhDY-	amhY-
31	Ko22	T22-1	M	Ag1371	amhX+	amhDY-	amhY-
32	Ko22	T22-17	M	Ag1387	amhX+	amhDY-	amhY-
33	Ko22	T22-2	M	Ag1372	amhX+	amhDY-	amhY-
34	Ko22	T22-18	M	Ag1388	amhX+	amhDY-	amhY-
35	Ko22	T22-7	M	Ag1377	amhX+	amhDY-	amhY-
36	Ko22	T22-19	M	Ag1389	amhX+	amhDY-	amhY-
37	Ko22	T22-8	M	Ag1378	amhX+	amhDY-	amhY-
38	Ko22	T22-20	M	Ag1390	amhX+	amhDY-	amhY-
39	Ko22	T22-11	M	Ag1381	amhX+	amhDY-	amhY-
40	Ko22	T22-21	M	Ag1391	amhX+	amhDY-	amhY-
41	Ko22	T22-13	M	Ag1383	amhX+	amhDY-	amhY-
42	Ko22	T22-22	M	Ag1392	amhX+	amhDY-	amhY-
43	Ko22	T22-14	M	Ag1384	amhX+	amhDY-	amhY-
44	Ko22	T22-23	M	Ag1393	amhX+	amhDY-	amhY-
45	Ko22	T22-15	M	Ag1385	amhX+	amhDY-	amhY-
46	Ko22	T22-26	M	Ag1396	amhX+	amhDY-	amhY-
47	Ko22	T22-28	M	Ag1398	amhX+	amhDY-	amhY-
48	Ko22	T22-51	M	Ag1421	amhX+	amhDY-	amhY-
49	Ko22	T22-29	M	Ag1399	amhX+	amhDY-	amhY-
50	Ko22	T22-52	M	Ag1422	amhX+	amhDY-	amhY-
51	Ko22	T22-30	M	Ag1400	amhX+	amhDY-	amhY-
52	Ko22	T22-53	M	Ag1423	amhX+	amhDY-	amhY-
53	Ko22	T22-31	M	Ag1401	amhX+	amhDY-	amhY-
54	Ko22	T22-54	M	Ag1424	amhX+	amhDY-	amhY-
55	Ko22	T22-32	M	Ag1402	amhX+	amhDY-	amhY-
56	Ko22	T22-55	M	Ag1425	amhX+	amhDY-	amhY-
57	Ko22	T22-38	M	Ag1408	amhX+	amhDY-	amhY-
58	Ko22	T22-57	M	Ag1427	amhX+	amhDY-	amhY-
59	Ko22	T22-39	M	Ag1409	amhX+	amhDY-	amhY-
60	Ko22	T22-45	M	Ag1415	amhX+	amhDY-	amhY-
1	Ko6	T6-1	F	D2638	amhX+	amhDY-	amhY-
2	Ko6	T6-2	F	D2639	amhX+	amhDY-	amhY-
3	Ko6	T6-3	F	D2640	amhX+	amhDY-	amhY-
4	Ko6	T6-4	F	D2641	amhX+	amhDY-	amhY-
5	Ko6	T6-5	F	D2642	amhX+	amhDY-	amhY-
6	Ko6	T6-6	F	D2643	amhX+	amhDY-	amhY-
7	Ko6	T6-7	F	D2644	amhX+	amhDY-	amhY-
8	Ko6	T6-8	F	D2645	amhX+	amhDY-	amhY-
9	Ko6	T6-9	F	D2646	amhX+	amhDY-	amhY-
10	Ko6	T6-10	F	D2647	amhX+	amhDY-	amhY-
11	Ko6	T6-11	F	D2648	amhX+	amhDY-	amhY-
12	Ko6	T6-12	F	D2649	amhX+	amhDY-	amhY-
13	Ko6	T6-13	F	D2650	amhX+	amhDY-	amhY-
14	Ko6	T6-14	F	D2651	amhX+	amhDY-	amhY-
15	Ko6	T6-15	F	D2652	amhX+	amhDY-	amhY-
16	Ko6	T6-16	F	D2653	amhX+	amhDY-	amhY-
17	Ko6	T6-17	F	D2654	amhX+	amhDY-	amhY-
18	Ko6	T6-18	F	D2655	amhX+	amhDY-	amhY-
19	Ko6	T6-19	F	D2656	amhX+	amhDY-	amhY-
20	Ko6	T6-20	F	D2657	amhX+	amhDY-	amhY-
21	Ko6	T6-21	F	D2658	amhX+	amhDY-	amhY-
22	Ko6	T6-22	F	D2659	amhX+	amhDY-	amhY-
23	Ko6	T6-23	F	D2660	amhX+	amhDY-	amhY-
24	Ko6	T6-24	F	D2661	amhX+	amhDY-	amhY-
25	Ko6	T6-25	F	D2662	amhX+	amhDY-	amhY-
26	Ko6	T6-26	F	D2663	amhX+	amhDY-	amhY-
27	Ko6	T6-27	F	D2664	amhX+	amhDY-	amhY-
28	Ko6	T6-28	F	D2665	amhX+	amhDY-	amhY-
29	Ko6	T6-29	F	D2666	amhX+	amhDY-	amhY-
30	Ko6	T6-30	F	D2667	amhX+	amhDY-	amhY-
1	Ko12	T12-50	M	D2313	amhX+	amhDY-	amhY+
2	Ko12	T12-64	M	D2317	amhX+	amhDY-	amhY+
3	Ko12	T12-2	M	D2288	amhX+	amhDY-	amhY-
4	Ko12	T12-3	M	D2289	amhX+	amhDY-	amhY-
5	Ko12	T12-4	M	D2290	amhX+	amhDY-	amhY-
6	Ko12	T12-6	M	D2291	amhX+	amhDY-	amhY-
7	Ko12	T12-7	M	D2292	amhX+	amhDY-	amhY-
8	Ko12	T12-8	M	D2293	amhX+	amhDY-	amhY-
9	Ko12	T12-10	M	D2294	amhX+	amhDY-	amhY-
10	Ko12	T12-11	M	D2295	amhX+	amhDY-	amhY-
11	Ko12	T12-12	M	D2296	amhX+	amhDY-	amhY-
12	Ko12	T12-13	M	D2297	amhX+	amhDY-	amhY-
13	Ko12	T12-14	M	D2298	amhX+	amhDY-	amhY-
14	Ko12	T12-15	M	D2299	amhX+	amhDY-	amhY-
15	Ko12	T12-16	M	D2300	amhX+	amhDY-	amhY-
16	Ko12	T12-18	M	D2301	amhX+	amhDY-	amhY-
17	Ko12	T12-23	M	D2302	amhX+	amhDY-	amhY-
18	Ko12	T12-28	M	D2303	amhX+	amhDY-	amhY-
19	Ko12	T12-31	M	D2304	amhX+	amhDY-	amhY-
20	Ko12	T12-32	M	D2305	amhX+	amhDY-	amhY-
21	Ko12	T12-34	M	D2306	amhX+	amhDY-	amhY-
22	Ko12	T12-35	M	D2307	amhX+	amhDY-	amhY-
23	Ko12	T12-37	M	D2308	amhX+	amhDY-	amhY-
24	Ko12	T12-38	M	D2309	amhX+	amhDY-	amhY-
25	Ko12	T12-41	M	D2310	amhX+	amhDY-	amhY-
26	Ko12	T12-42	M	D2311	amhX+	amhDY-	amhY-
27	Ko12	T12-49	M	D2312	amhX+	amhDY-	amhY-
28	Ko12	T12-53	M	D2314	amhX+	amhDY-	amhY-
29	Ko12	T12-56	M	D2315	amhX+	amhDY-	amhY-
30	Ko12	T12-58	M	D2316	amhX+	amhDY-	amhY-
31	Ko12	T12-1	F	D2258	amhX+	amhDY-	amhY+
32	Ko12	T12-9	F	D2260	amhX+	amhDY-	amhY+
33	Ko12	T12-5	F	D2259	amhX+	amhDY-	amhY-
34	Ko12	T12-17	F	D2261	amhX+	amhDY-	amhY-
35	Ko12	T12-19	F	D2262	amhX+	amhDY-	amhY-
36	Ko12	T12-20	F	D2263	amhX+	amhDY-	amhY-
37	Ko12	T12-21	F	D2264	amhX+	amhDY-	amhY-
38	Ko12	T12-22	F	D2265	amhX+	amhDY-	amhY-
39	Ko12	T12-24	F	D2266	amhX+	amhDY-	amhY-
40	Ko12	T12-25	F	D2267	amhX+	amhDY-	amhY-
41	Ko12	T12-26	F	D2268	amhX+	amhDY-	amhY-
42	Ko12	T12-27	F	D2269	amhX+	amhDY-	amhY-
43	Ko12	T12-29	F	D2270	amhX+	amhDY-	amhY-
44	Ko12	T12-33	F	D2271	amhX+	amhDY-	amhY-
45	Ko12	T12-36	F	D2272	amhX+	amhDY-	amhY-
46	Ko12	T12-39	F	D2273	amhX+	amhDY-	amhY-
47	Ko12	T12-40	F	D2274	amhX+	amhDY-	amhY-
48	Ko12	T12-43	F	D2275	amhX+	amhDY-	amhY-
49	Ko12	T12-44	F	D2276	amhX+	amhDY-	amhY-
50	Ko12	T12-45	F	D2277	amhX+	amhDY-	amhY-
51	Ko12	T12-46	F	D2278	amhX+	amhDY-	amhY-
52	Ko12	T12-47	F	D2279	amhX+	amhDY-	amhY-
53	Ko12	T12-48	F	D2280	amhX+	amhDY-	amhY-
54	Ko12	T12-51	F	D2281	amhX+	amhDY-	amhY-
55	Ko12	T12-52	F	D2282	amhX+	amhDY-	amhY-
56	Ko12	T12-54	F	D2283	amhX+	amhDY-	amhY-
57	Ko12	T12-55	F	D2284	amhX+	amhDY-	amhY-
58	Ko12	T12-57	F	D2285	amhX+	amhDY-	amhY-
59	Ko12	T12-60	F	D2286	amhX+	amhDY-	amhY-
60	Ko12	T12-61	F	D2287	amhX+	amhDY-	amhY-
1	Ko17	T17-31	M	D2168	amhX+	amhDY+	amhY+
2	Ko17	T17-32	M	D2169	amhX+	amhDY+	amhY+
3	Ko17	T17-33	M	D2170	amhX+	amhDY+	amhY+
4	Ko17	T17-34	M	D2171	amhX+	amhDY+	amhY+
5	Ko17	T17-35	M	D2172	amhX+	amhDY+	amhY+
6	Ko17	T17-36	M	D2173	amhX+	amhDY+	amhY+
7	Ko17	T17-37	M	D2174	amhX+	amhDY+	amhY+
8	Ko17	T17-38	M	D2175	amhX+	amhDY+	amhY+
9	Ko17	T17-39	M	D2176	amhX+	amhDY+	amhY+
10	Ko17	T17-40	M	D2177	amhX+	amhDY+	amhY+
11	Ko17	T17-41	M	D2178	amhX+	amhDY+	amhY+
12	Ko17	T17-42	M	D2179	amhX+	amhDY+	amhY+
13	Ko17	T17-43	M	D2180	amhX+	amhDY+	amhY+
14	Ko17	T17-44	M	D2181	amhX+	amhDY+	amhY+
15	Ko17	T17-45	M	D2182	amhX+	amhDY+	amhY+
16	Ko17	T17-46	M	D2183	amhX+	amhDY+	amhY+
17	Ko17	T17-47	M	D2184	amhX+	amhDY+	amhY+
18	Ko17	T17-48	M	D2185	amhX+	amhDY+	amhY+
19	Ko17	T17-49	M	D2186	amhX+	amhDY+	amhY+
20	Ko17	T17-50	M	D2187	amhX+	amhDY+	amhY+
21	Ko17	T17-51	M	D2188	amhX+	amhDY+	amhY+
22	Ko17	T17-52	M	D2189	amhX+	amhDY+	amhY+
23	Ko17	T17-53	M	D2190	amhX+	amhDY+	amhY+
24	Ko17	T17-54	M	D2191	amhX+	amhDY+	amhY+
25	Ko17	T17-55	M	D2192	amhX+	amhDY+	amhY+
26	Ko17	T17-57	M	D2194	amhX+	amhDY+	amhY+
27	Ko17	T17-58	M	D2195	amhX+	amhDY+	amhY+
28	Ko17	T17-60	M	D2197	amhX+	amhDY+	amhY+
29	Ko17	T17-59	M	D2196	amhX+	amhDY-	amhY+
30	Ko17	T17-1	F	D2138	amhX+	amhDY-	amhY+
31	Ko17	T17-2	F	D2139	amhX+	amhDY-	amhY+
32	Ko17	T17-3	F	D2140	amhX+	amhDY-	amhY+
33	Ko17	T17-4	F	D2141	amhX+	amhDY-	amhY+
34	Ko17	T17-6	F	D2143	amhX+	amhDY-	amhY+
35	Ko17	T17-8	F	D2145	amhX+	amhDY-	amhY+
36	Ko17	T17-9	F	D2146	amhX+	amhDY-	amhY+
37	Ko17	T17-12	F	D2149	amhX+	amhDY-	amhY+
38	Ko17	T17-13	F	D2150	amhX+	amhDY-	amhY+
39	Ko17	T17-14	F	D2151	amhX+	amhDY-	amhY+
40	Ko17	T17-19	F	D2156	amhX+	amhDY-	amhY+
41	Ko17	T17-21	F	D2158	amhX+	amhDY-	amhY+
42	Ko17	T17-22	F	D2159	amhX+	amhDY-	amhY+
43	Ko17	T17-23	F	D2160	amhX+	amhDY-	amhY+
44	Ko17	T17-24	F	D2161	amhX+	amhDY-	amhY+
45	Ko17	T17-25	F	D2162	amhX+	amhDY-	amhY+
46	Ko17	T17-26	F	D2163	amhX+	amhDY-	amhY+
47	Ko17	T17-27	F	D2164	amhX+	amhDY-	amhY+
48	Ko17	T17-29	F	D2166	amhX+	amhDY-	amhY+
49	Ko17	T17-5	F	D2142	amhX+	amhDY-	amhY-
50	Ko17	T17-7	F	D2144	amhX+	amhDY-	amhY-
51	Ko17	T17-10	F	D2147	amhX+	amhDY-	amhY-
52	Ko17	T17-11	F	D2148	amhX+	amhDY-	amhY-
53	Ko17	T17-15	F	D2152	amhX+	amhDY-	amhY-
54	Ko17	T17-16	F	D2153	amhX+	amhDY-	amhY-
55	Ko17	T17-17	F	D2154	amhX+	amhDY-	amhY-
56	Ko17	T17-18	F	D2155	amhX+	amhDY-	amhY-
57	Ko17	T17-20	F	D2157	amhX+	amhDY-	amhY-
58	Ko17	T17-28	F	D2165	amhX+	amhDY-	amhY-
59	Ko17	T17-30	F	D2167	amhX+	amhDY-	amhY-
1	Ko29	T29-86	M	D2880	amhX+	amhDY+	amhY+
2	Ko29	T29-91	M	D2882	amhX+	amhDY+	amhY+
3	Ko29	T29-93	M	D2884	amhX+	amhDY+	amhY+
4	Ko29	T29-94	M	D2885	amhX+	amhDY+	amhY+
5	Ko29	T29-101	M	D2888	amhX+	amhDY+	amhY+
6	Ko29	T29-2	M	D2832	amhX+	amhDY+	amhY+
7	Ko29	T29-3	M	D2833	amhX+	amhDY+	amhY+
8	Ko29	T29-4	M	D2834	amhX+	amhDY+	amhY+
9	Ko29	T29-8	M	D2835	amhX+	amhDY+	amhY+
10	Ko29	T29-9	M	D2836	amhX+	amhDY+	amhY+
11	Ko29	T29-10	M	D2837	amhX+	amhDY+	amhY+
12	Ko29	T29-12	M	D2838	amhX+	amhDY+	amhY+
13	Ko29	T29-13	M	D2839	amhX+	amhDY+	amhY+
14	Ko29	T29-15	M	D2840	amhX+	amhDY+	amhY+
15	Ko29	T29-18	M	D2841	amhX+	amhDY+	amhY+
16	Ko29	T29-19	M	D2842	amhX+	amhDY+	amhY+
17	Ko29	T29-20	M	D2843	amhX+	amhDY+	amhY+
18	Ko29	T29-23	M	D2844	amhX+	amhDY+	amhY+
19	Ko29	T29-25	M	D2845	amhX+	amhDY+	amhY+
20	Ko29	T29-26	M	D2846	amhX+	amhDY+	amhY+
21	Ko29	T29-27	M	D2847	amhX+	amhDY+	amhY+
22	Ko29	T29-30	M	D2848	amhX+	amhDY+	amhY+
23	Ko29	T29-31	M	D2849	amhX+	amhDY+	amhY+
24	Ko29	T29-32	M	D2850	amhX+	amhDY+	amhY+
25	Ko29	T29-33	M	D2851	amhX+	amhDY+	amhY+
26	Ko29	T29-34	M	D2852	amhX+	amhDY+	amhY+
27	Ko29	T29-35	M	D2853	amhX+	amhDY+	amhY+
28	Ko29	T29-36	M	D2854	amhX+	amhDY+	amhY+
29	Ko29	T29-38	M	D2855	amhX+	amhDY+	amhY+
30	Ko29	T29-39	M	D2856	amhX+	amhDY+	amhY+
31	Ko29	T29-40	M	D2857	amhX+	amhDY+	amhY+
32	Ko29	T29-41	M	D2858	amhX+	amhDY+	amhY+
33	Ko29	T29-43	M	D2859	amhX+	amhDY+	amhY+
34	Ko29	T29-48	M	D2860	amhX+	amhDY+	amhY+
35	Ko29	T29-49	M	D2861	amhX+	amhDY+	amhY+
36	Ko29	T29-50	M	D2862	amhX+	amhDY+	amhY+
37	Ko29	T29-53	M	D2864	amhX+	amhDY+	amhY+
38	Ko29	T29-59	M	D2865	amhX+	amhDY+	amhY+
39	Ko29	T29-61	M	D2866	amhX+	amhDY+	amhY+
40	Ko29	T29-65	M	D2867	amhX+	amhDY+	amhY+
41	Ko29	T29-66	M	D2868	amhX+	amhDY+	amhY+
42	Ko29	T29-68	M	D2869	amhX+	amhDY+	amhY+
43	Ko29	T29-69	M	D2870	amhX+	amhDY+	amhY+
44	Ko29	T29-72	M	D2871	amhX+	amhDY+	amhY+
45	Ko29	T29-74	M	D2872	amhX+	amhDY+	amhY+
46	Ko29	T29-75	M	D2873	amhX+	amhDY+	amhY+
47	Ko29	T29-79	M	D2875	amhX+	amhDY+	amhY+
48	Ko29	T29-81	M	D2876	amhX+	amhDY+	amhY+
49	Ko29	T29-96	M	D2886	amhX+	amhDY+	amhY+
50	Ko29	T29-98	M	D2887	amhX+	amhDY-	amhY+
51	Ko29	T29-76	M	D2874	amhX+	amhDY-	amhY+
52	Ko29	T29-44	F	D2803	amhX+	amhDY+	amhY+
53	Ko29	T29-45	F	D2804	amhX+	amhDY-	amhY+
54	Ko29	T29-55	F	D2809	amhX+	amhDY-	amhY+
55	Ko29	T29-56	F	D2810	amhX+	amhDY-	amhY+
56	Ko29	T29-6	F	D2791	amhX+	amhDY-	amhY+
57	Ko29	T29-11	F	D2793	amhX+	amhDY-	amhY+
58	Ko29	T29-14	F	D2794	amhX+	amhDY-	amhY+
59	Ko29	T29-16	F	D2795	amhX+	amhDY-	amhY+
60	Ko29	T29-21	F	D2796	amhX+	amhDY-	amhY+
61	Ko29	T29-24	F	D2798	amhX+	amhDY-	amhY+
62	Ko29	T29-29	F	D2800	amhX+	amhDY-	amhY+
63	Ko29	T29-46	F	D2805	amhX+	amhDY-	amhY+
64	Ko29	T29-47	F	D2806	amhX+	amhDY-	amhY+
65	Ko29	T29-52	F	D2807	amhX+	amhDY-	amhY+
66	Ko29	T29-54	F	D2808	amhX+	amhDY-	amhY+
67	Ko29	T29-57	F	D2811	amhX+	amhDY-	amhY+
68	Ko29	T29-58	F	D2812	amhX+	amhDY-	amhY+
69	Ko29	T29-60	F	D2813	amhX+	amhDY-	amhY+
70	Ko29	T29-70	F	D2818	amhX+	amhDY-	amhY+
71	Ko29	T29-73	F	D2819	amhX+	amhDY-	amhY+
72	Ko29	T29-78	F	D2821	amhX+	amhDY-	amhY+
73	Ko29	T29-80	F	D2822	amhX+	amhDY-	amhY+
74	Ko29	T29-87	F	D2824	amhX+	amhDY-	amhY+
75	Ko29	T29-88	F	D2825	amhX+	amhDY-	amhY+
76	Ko29	T29-95	F	D2827	amhX+	amhDY-	amhY+
77	Ko29	T29-97	F	D2828	amhX+	amhDY-	amhY+
78	Ko29	T29-99	F	D2829	amhX+	amhDY-	amhY+
79	Ko29	T29-5	F	D2790	amhX+	amhDY-	amhY-
80	Ko29	T29-7	F	D2792	amhX+	amhDY-	amhY-
81	Ko29	T29-22	F	D2797	amhX+	amhDY-	amhY-
82	Ko29	T29-37	F	D2801	amhX+	amhDY-	amhY-
83	Ko29	T29-42	F	D2802	amhX+	amhDY-	amhY-
84	Ko29	T29-62	F	D2814	amhX+	amhDY-	amhY-
85	Ko29	T29-63	F	D2815	amhX+	amhDY-	amhY-
86	Ko29	T29-64	F	D2816	amhX+	amhDY-	amhY-
87	Ko29	T29-67	F	D2817	amhX+	amhDY-	amhY-
88	Ko29	T29-77	F	D2820	amhX+	amhDY-	amhY-
89	Ko29	T29-84	F	D2823	amhX+	amhDY-	amhY-
90	Ko29	T29-89	F	D2826	amhX+	amhDY-	amhY-
91	Ko29	T29-100	F	D2830	amhX+	amhDY-	amhY-
1	Ko24	T24-3	M	D2750	amhX+	amhDY+	amhY+
2	Ko24	T24-4	M	D2228	amhX+	amhDY+	amhY+
3	Ko24	T24-5	M	D2229	amhX+	amhDY+	amhY+
4	Ko24	T24-6	M	D2230	amhX+	amhDY+	amhY+
5	Ko24	T24-7	M	D2231	amhX+	amhDY+	amhY+
6	Ko24	T24-9	M	D2232	amhX+	amhDY+	amhY+
7	Ko24	T24-11	M	D2233	amhX+	amhDY+	amhY+
8	Ko24	T24-12	M	D2234	amhX+	amhDY+	amhY+
9	Ko24	T24-14	M	D2235	amhX+	amhDY+	amhY+
10	Ko24	T24-18	M	D2236	amhX+	amhDY+	amhY+
11	Ko24	T24-19	M	D2237	amhX+	amhDY+	amhY+
12	Ko24	T24-20	M	D2238	amhX+	amhDY+	amhY+
13	Ko24	T24-21	M	D2239	amhX+	amhDY+	amhY+
14	Ko24	T24-27	M	D2242	amhX+	amhDY+	amhY+
15	Ko24	T24-31	M	D2243	amhX+	amhDY+	amhY+
16	Ko24	T24-33	M	D2245	amhX+	amhDY+	amhY+
17	Ko24	T24-34	M	D2246	amhX+	amhDY+	amhY+
18	Ko24	T24-35	M	D2247	amhX+	amhDY+	amhY+
19	Ko24	T24-40	M	D2249	amhX+	amhDY+	amhY+
20	Ko24	T24-43	M	D2250	amhX+	amhDY+	amhY+
21	Ko24	T24-44	M	D2251	amhX+	amhDY+	amhY+
22	Ko24	T24-45	M	D2252	amhX+	amhDY+	amhY+
23	Ko24	T24-47	M	D2253	amhX+	amhDY+	amhY+
24	Ko24	T24-50	M	D2254	amhX+	amhDY+	amhY+
25	Ko24	T24-55	M	D2256	amhX+	amhDY+	amhY+
26	Ko24	T24-1	M	D2748	amhX+	amhDY+	amhY+
27	Ko24	T24-17	M	D2752	amhX+	amhDY+	amhY+
28	Ko24	T24-24	M	D2753	amhX+	amhDY+	amhY+
29	Ko24	T24-28	M	D2754	amhX+	amhDY+	amhY+
30	Ko24	T24-39	M	D2755	amhX+	amhDY+	amhY+
31	Ko24	T24-41	M	D2756	amhX+	amhDY+	amhY+
32	Ko24	T24-51	M	D2757	amhX+	amhDY+	amhY+
33	Ko24	T24-52	M	D2758	amhX+	amhDY+	amhY+
34	Ko24	T24-59	M	D2759	amhX+	amhDY+	amhY+
35	Ko24	T24-60	M	D2760	amhX+	amhDY+	amhY+
36	Ko24	T24-64	M	D2762	amhX+	amhDY+	amhY+
37	Ko24	T24-65	M	D2763	amhX+	amhDY+	amhY+
38	Ko24	T24-66	M	D2764	amhX+	amhDY+	amhY+
39	Ko24	T24-67	M	D2765	amhX+	amhDY+	amhY+
40	Ko24	T24-70	M	D2767	amhX+	amhDY+	amhY+
41	Ko24	T24-71	M	D2768	amhX+	amhDY+	amhY+
42	Ko24	T24-72	M	D2769	amhX+	amhDY+	amhY+
43	Ko24	T24-73	M	D2770	amhX+	amhDY+	amhY+
44	Ko24	T24-74	M	D2771	amhX+	amhDY+	amhY+
45	Ko24	T24-75	M	D2772	amhX+	amhDY+	amhY+
46	Ko24	T24-78	M	D2773	amhX+	amhDY+	amhY+
47	Ko24	T24-79	M	D2774	amhX+	amhDY+	amhY+
48	Ko24	T24-81	M	D2775	amhX+	amhDY+	amhY+
49	Ko24	T24-83	M	D2776	amhX+	amhDY+	amhY+
50	Ko24	T24-84	M	D2777	amhX+	amhDY+	amhY+
51	Ko24	T24-85	M	D2778	amhX+	amhDY+	amhY+
52	Ko24	T24-86	M	D2779	amhX+	amhDY+	amhY+
53	Ko24	T24-88	M	D2781	amhX+	amhDY+	amhY+
54	Ko24	T24-90	M	D2782	amhX+	amhDY+	amhY+
55	Ko24	T24-92	M	D2783	amhX+	amhDY+	amhY+
56	Ko24	T24-93	M	D2784	amhX+	amhDY+	amhY+
57	Ko24	T24-94	M	D2785	amhX+	amhDY+	amhY+
58	Ko24	T24-98	M	D2786	amhX+	amhDY+	amhY+
59	Ko24	T24-99	M	D2787	amhX+	amhDY+	amhY+
60	Ko24	T24-100	M	D2788	amhX+	amhDY+	amhY+
61	Ko24	T24-22	M	D2240	amhX+	amhDY-	amhY+
62	Ko24	T24-25	M	D2241	amhX+	amhDY-	amhY+
63	Ko24	T24-32	M	D2244	amhX+	amhDY-	amhY+
64	Ko24	T24-36	M	D2248	amhX+	amhDY-	amhY+
65	Ko24	T24-54	M	D2255	amhX+	amhDY-	amhY+
66	Ko24	T24-58	M	D2257	amhX+	amhDY-	amhY+
67	Ko24	T24-10	M	D2751	amhX+	amhDY-	amhY+
68	Ko24	T24-62	M	D2761	amhX+	amhDY-	amhY+
69	Ko24	T24-69	M	D2766	amhX+	amhDY-	amhY+
70	Ko24	T24-87	M	D2780	amhX+	amhDY-	amhY+
71	Ko24	T24-95	F	D2224	amhX+	amhDY+	amhY+
72	Ko24	T24-97	F	D2226	amhX+	amhDY+	amhY+
73	Ko24	T24-102	F	D2227	amhX+	amhDY+	amhY+
74	Ko24	T24-8	F	D2198	amhX+	amhDY-	amhY+
75	Ko24	T24-15	F	D2200	amhX+	amhDY-	amhY+
76	Ko24	T24-16	F	D2201	amhX+	amhDY-	amhY+
77	Ko24	T24-23	F	D2202	amhX+	amhDY-	amhY+
78	Ko24	T24-26	F	D2203	amhX+	amhDY-	amhY+
79	Ko24	T24-46	F	D2209	amhX+	amhDY-	amhY+
80	Ko24	T24-48	F	D2210	amhX+	amhDY-	amhY+
81	Ko24	T24-53	F	D2212	amhX+	amhDY-	amhY+
82	Ko24	T24-56	F	D2213	amhX+	amhDY-	amhY+
83	Ko24	T24-57	F	D2214	amhX+	amhDY-	amhY+
84	Ko24	T24-76	F	D2218	amhX+	amhDY-	amhY+
85	Ko24	T24-77	F	D2219	amhX+	amhDY-	amhY+
86	Ko24	T24-80	F	D2220	amhX+	amhDY-	amhY+
87	Ko24	T24-82	F	D2221	amhX+	amhDY-	amhY+
88	Ko24	T24-89	F	D2222	amhX+	amhDY-	amhY+
89	Ko24	T24-91	F	D2223	amhX+	amhDY-	amhY+
90	Ko24	T24-96	F	D2225	amhX+	amhDY-	amhY+
91	Ko24	T24-13	F	D2199	amhX+	amhDY-	amhY-
92	Ko24	T24-29	F	D2204	amhX+	amhDY-	amhY-
93	Ko24	T24-30	F	D2205	amhX+	amhDY-	amhY-
94	Ko24	T24-37	F	D2206	amhX+	amhDY-	amhY-
95	Ko24	T24-38	F	D2207	amhX+	amhDY-	amhY-
96	Ko24	T24-42	F	D2208	amhX+	amhDY-	amhY-
97	Ko24	T24-49	F	D2211	amhX+	amhDY-	amhY-
98	Ko24	T24-61	F	D2215	amhX+	amhDY-	amhY-
99	Ko24	T24-63	F	D2216	amhX+	amhDY-	amhY-
100	Ko24	T24-68	F	D2217	amhX+	amhDY-	amhY-
