# Supplementary material for: Mismatches between the genetic and phenotypic sex in the wild Kou population of Nile tilapia Oreochromis niloticus
Source: PeerJ. 2019 Sep 18;7:e7709. doi: 10.7717/peerj.7709 (PMC6754722; doi:10.7717/peerj.7709)
Supplement: Table S13 — Three males with nine females were stocked in a 3 m3 concrete basin and 30 days after, we collected eggs and larva. According to the development stages described by FujimuraOkada2007, we selected the larva which were at the stages 25 to 27, and transferred them to 2 ×300 L aquaria where they were treated at 27 ±2° C 36 ±2° C respectively during 30 days. After the thermal treatment, they were reared at 27 ±2° C for 60 days. 320 fish per treatment were sacrificed for sex-ratio analysis at ∼90 dpf. [file peerj-07-7709-s015.xlsx]

## Sheet: Table S13
Temperature treatments	Sex-ratio			Sex ratio vs 1:1		Sex Ratio at 36°C vs Sex Ratio at 27°C
	N sexed	Males ratio (N)	Males ratio (%)	P-value	Sig.	P-value	Sig.
Control (27°C)	320	151	47.1875	0.527	NS	<0.0000001	***
36°C	320	236	73.75	<0.0000001	***
Significance (Sig): *5%; **1%; ***0.1% and NS for non-significant
